# Supplementary material for: B7-H3: An Attractive Target for Antibody-based Immunotherapy
Source: Oxford University Press journal article supplement (doi:10.1158/1078-0432.ccr-20-2584), 2020-10-13
Supplement: 10780432ccr202584-sup-246445_2_supp_6598401_qh5212.xlsx [file 10780432ccr202584-sup-246445_2_supp_6598401_qh5212.xlsx]

## Sheet: Supplementary Table 1
Supplementary Table 1 - Correlation of B7-H3 expression level with protein levels in 378 human cancer cell lines listed in the Cancer Cell Line Encyclopedia
All normalized quantitative proteomics data that were analyzed were obtained from Nusinow et al., Cell 2020 (Reference 55, accessed 08/19/2020). Normalized quantitative proteomics data were first preprocessed, removing all proteins with >1 entry and those without gene symbols. Next, Pearson correlation coefficients (r) were computed between the normalized expression of each protein and the normal…
Protein	t-statistic	Pearson correlation coefficient with CD276 (r)	Degrees of freedom
CD276	N/A	1	376
A1CF	-1.26143	-0.0825345	232
A2M	5.86462	0.289494	376
A2ML1	-1.15606	-0.107182	115
AAAS	3.46097	0.175709	376
AACS	-2.67184	-0.1365	376
AADAT	4.85706	0.358466	160
AAED1	2.93997	0.247027	133
AAGAB	-3.22712	-0.164168	376
AAK1	2.55209	0.130489	376
AAMDC	-8.2294	-0.390672	376
AAMP	-3.81538	-0.193062	376
AAR2	1.88335	0.0966714	376
AARS	-9.09091	-0.424492	376
AARS2	2.78703	0.142268	376
AASDH	0.164458	0.0250718	43
AASDHPPT	-7.19724	-0.347973	376
AASS	5.68573	0.281373	376
AATF	4.58493	0.230105	376
ABAT	5.0434	0.257559	358
ABCA1	2.6476	0.150129	304
ABCA10	3.24367	0.248398	160
ABCA12	0.114004	0.00876917	169
ABCA13	-2.63311	-0.215761	142
ABCA2	4.50359	0.269487	259
ABCA3	-1.43163	-0.088607	259
ABCA4	-0.972005	-0.23613	16
ABCA5	1.69433	0.228732	52
ABCA7	-0.0758732	-0.00853609	79
ABCA8	-0.295387	-0.110956	7
ABCA9	-1.14301	-0.396591	7
ABCB1	-0.893069	-0.0563928	250
ABCB10	-2.37462	-0.121554	376
ABCB11	-0.183056	-0.0234314	61
ABCB4	-0.929606	-0.0609183	232
ABCB5	-1.30867	-0.121135	115
ABCB6	4.92721	0.246275	376
ABCB7	0.448763	0.023137	376
ABCB8	2.21831	0.113659	376
ABCC1	8.17982	0.388675	376
ABCC10	4.54647	0.281059	241
ABCC2	1.72075	0.112259	232
ABCC3	2.28454	0.122956	340
ABCC4	2.59646	0.132717	376
ABCC5	5.89143	0.324456	295
ABCC6	0.287712	0.0398667	52
ABCC8	1.53467	0.120443	160
ABCD1	4.13946	0.208772	376
ABCD3	6.96588	0.338084	376
ABCD4	3.84785	0.23254	259
ABCE1	-8.88988	-0.41675	376
ABCF2	-2.64996	-0.135403	376
ABCF3	-5.27909	-0.262687	376
ABCG1	-0.784712	-0.0833594	88
ABCG2	1.69791	0.129508	169
ABHD10	2.36525	0.121081	376
ABHD11	3.50523	0.177885	376
ABHD12	6.30866	0.309382	376
ABHD13	3.09493	0.225974	178
ABHD14A	0.350089	0.0372937	88
ABHD14B	-11.4602	-0.508798	376
ABHD15	2.85269	0.322718	70
ABHD16A	4.80628	0.240585	376
ABHD17A	2.27845	0.133521	286
ABHD17B	0.63044	0.0333013	358
ABHD17C	2.1239	0.149991	196
ABHD2	0.798821	0.0848476	88
ABHD3	0.903133	0.0808383	124
ABHD4	0.590438	0.0366634	259
ABHD5	0.108581	0.00663247	268
ABHD6	2.2945	0.125126	331
ABI1	-4.78542	-0.239601	376
ABI2	3.66938	0.185934	376
ABI3	-4.9422	-0.432752	106
ABI3BP	1.51886	0.159829	88
ABL1	-3.98873	-0.206277	358
ABL2	-1.66407	-0.0898817	340
ABLIM1	4.26317	0.214728	376
ABLIM2	1.39196	0.0807782	295
ABLIM3	3.32201	0.179624	331
ABO	2.01531	0.293771	43
ABR	-2.55698	-0.1323	367
ABRACL	-10.091	-0.475258	349
ABT1	-2.27549	-0.11655	376
ABTB1	0.945563	0.130013	52
ABTB2	1.03482	0.0893715	133
ACAA1	2.35725	0.120678	376
ACAA2	-3.95975	-0.200079	376
ACACA	-2.67331	-0.136574	376
ACACB	-2.92921	-0.152991	358
ACAD10	2.31592	0.118592	376
ACAD11	4.96741	0.25393	358
ACAD8	-0.0418557	-0.00215854	376
ACAD9	3.57923	0.181518	376
ACADL	1.664	0.245962	43
ACADM	-0.682425	-0.0351716	376
ACADS	2.48944	0.127338	376
ACADSB	3.83204	0.193873	376
ACADVL	5.50221	0.272978	376
ACAN	1.69457	0.279071	34
ACAP1	-8.11518	-0.463266	241
ACAP2	-8.62202	-0.406293	376
ACAP3	-5.55917	-0.342856	232
ACAT1	-3.30955	-0.168244	376
ACAT2	-6.89278	-0.334936	376
ACBD3	5.96038	0.293816	376
ACBD4	0.671945	0.0530471	160
ACBD5	6.29868	0.308939	376
ACBD6	-5.80136	-0.286629	376
ACBD7	-1.60495	-0.09757	268
ACCS	0.601926	0.119522	25
ACD	-3.81677	-0.208046	322
ACE	-1.79027	-0.121474	214
ACE2	1.57734	0.213685	52
ACHE	-1.79382	-0.337689	25
ACKR2	1.04996	0.205509	25
ACKR3	0.456357	0.0780259	34
ACN9	-0.394622	-0.0211189	349
ACO1	-4.20501	-0.211931	376
ACO2	0.784905	0.0404452	376
ACOT1	-0.118257	-0.00934859	160
ACOT11	-0.155421	-0.00878459	313
ACOT13	1.06804	0.0549965	376
ACOT2	1.98348	0.101759	376
ACOT4	-0.293599	-0.020066	214
ACOT7	1.08824	0.0560337	376
ACOT8	3.62154	0.183592	376
ACOT9	7.08566	0.343218	376
ACOX1	6.18376	0.303827	376
ACOX2	0.950307	0.143422	43
ACOX3	2.52709	0.132385	358
ACP2	7.09632	0.343674	376
ACP5	2.62092	0.172867	223
ACP6	4.57914	0.22983	376
ACPL2	2.38071	0.25873	79
ACPP	-0.462289	-0.0292252	250
ACSBG1	-2.74833	-0.566295	16
ACSF2	3.03229	0.154501	376
ACSF3	-3.37517	-0.171483	376
ACSL1	1.76605	0.0907015	376
ACSL3	6.94857	0.33734	376
ACSL4	-1.31627	-0.0677255	376
ACSL5	-3.77561	-0.191123	376
ACSL6	-0.770358	-0.045505	286
ACSM2B	0.34318	0.0684749	25
ACSM3	-3.21307	-0.173915	331
ACSS1	-1.66636	-0.086656	367
ACSS2	-3.33529	-0.169515	376
ACSS3	5.00373	0.2797	295
ACTA1	0.546822	0.135446	16
ACTA2	3.36349	0.170907	376
ACTB	4.38167	0.22041	376
ACTBL2	0.758572	0.043466	304
ACTG1	-8.24007	-0.395127	367
ACTL6A	1.25054	0.0643582	376
ACTL6B	-0.184446	-0.0236093	61
ACTL8	-1.074	-0.0553026	376
ACTN2	0.261308	0.0278447	88
ACTN3	1.41093	0.156779	79
ACTR10	-2.13097	-0.109239	376
ACTR1A	-1.53982	-0.0791608	376
ACTR1B	-2.58714	-0.146776	304
ACTR2	-5.2413	-0.260935	376
ACTR3	-3.15469	-0.16058	376
ACTR3B	-3.12322	-0.160907	367
ACTR5	1.51985	0.0781405	376
ACTR6	2.56353	0.135949	349
ACTR8	-2.97565	-0.155358	358
ACVR1	8.45933	0.412498	349
ACVR1B	3.68619	0.239652	223
ACVR2A	3.16334	0.319535	88
ACY1	-5.63	-0.27883	376
ACY3	-3.26192	-0.314403	97
ACYP1	-11.1196	-0.497462	376
ACYP2	-7.59312	-0.364626	376
ADA	-4.4549	-0.223911	376
ADAL	-4.89016	-0.277781	286
ADAM10	6.20011	0.304557	376
ADAM12	2.53612	0.29009	70
ADAM15	7.07144	0.34261	376
ADAM17	11.6526	0.515088	376
ADAM19	0.7983	0.0894556	79
ADAM22	5.41919	0.482077	97
ADAM28	2.14717	0.189334	124
ADAM8	1.45885	0.129899	124
ADAM9	10.0883	0.461538	376
ADAMTS1	5.0258	0.302925	250
ADAMTS12	2.6913	0.208108	160
ADAMTS15	1.00034	0.137407	52
ADAMTS3	-0.344757	-0.0440986	61
ADAMTS4	1.67121	0.317003	25
ADAMTS5	2.52391	0.28881	70
ADAMTS9	1.84799	0.572623	7
ADAMTSL1	0.382821	0.0430309	79
ADAMTSL4	-0.121564	-0.00849008	205
ADAP1	-1.65951	-0.0908375	331
ADAP2	-0.192698	-0.0385111	25
ADAR	3.64405	0.184694	376
ADARB1	1.02213	0.0585227	304
ADAT1	-1.26944	-0.0800289	250
ADAT2	-10.908	-0.514219	331
ADAT3	-5.08642	-0.280053	304
ADCK1	-0.263267	-0.0208086	160
ADCK2	0.767793	0.0978343	61
ADCK3	-5.15034	-0.256708	376
ADCK4	8.62988	0.406602	376
ADCK5	1.1821	0.0905573	169
ADCY10	-2.07784	-0.276879	52
ADCY3	3.04847	0.192689	241
ADCY5	7.27993	0.385296	304
ADCY6	7.87117	0.459091	232
ADCY7	1.82777	0.201425	79
ADCY9	7.24259	0.39368	286
ADD1	4.52287	0.227152	376
ADD2	0.381054	0.0198869	367
ADD3	4.88317	0.244206	376
ADH1C	-0.736892	-0.0637666	133
ADH4	-0.512224	-0.127019	16
ADH5	-4.23411	-0.213331	376
ADH6	-1.98909	-0.290273	43
ADH7	0.772929	0.0919909	70
ADI1	-10.1783	-0.464768	376
ADIPOR1	3.18156	0.208376	223
ADIPOR2	-1.25208	-0.104497	142
ADIRF	-0.918556	-0.0473178	376
ADK	-8.01247	-0.381893	376
ADM	-0.152423	-0.0232381	43
ADNP	5.08278	0.253558	376
ADNP2	2.46716	0.144358	286
ADO	-6.64344	-0.324115	376
ADPGK	7.87091	0.376108	376
ADPRH	-0.61384	-0.0410711	223
ADPRHL2	-3.43093	-0.174231	376
ADRA2A	-2.15438	-0.346575	34
ADRBK1	-12.1414	-0.530698	376
ADRM1	-3.27348	-0.166461	376
ADSL	-6.14164	-0.301948	376
ADSS	-7.66048	-0.367426	376
ADSSL1	-5.86354	-0.292672	367
AEBP1	-0.907546	-0.0784517	133
AEBP2	2.47126	0.157208	241
AES	-1.41595	-0.0809439	304
AFAP1	8.41283	0.398013	376
AFAP1L1	5.02984	0.303146	250
AFAP1L2	4.06343	0.207493	367
AFF1	-0.484203	-0.0262506	340
AFF3	-2.83062	-0.153735	331
AFF4	9.63689	0.445052	376
AFG3L2	-0.230465	-0.0118845	376
AFMID	-3.6451	-0.321824	115
AFP	1.79241	0.108838	268
AFTPH	-7.731	-0.370346	376
AGA	3.7496	0.196787	349
AGAP1	2.21053	0.129609	286
AGAP2	-5.02352	-0.378409	151
AGAP3	4.74586	0.240463	367
AGFG1	-4.83894	-0.242124	376
AGFG2	-3.56272	-0.185044	358
AGGF1	1.2523	0.0660419	358
AGK	4.92784	0.246305	376
AGL	-0.476856	-0.0245845	376
AGMAT	-3.57376	-0.183385	367
AGMO	-0.529755	-0.105361	25
AGO1	0.282295	0.0161886	304
AGO2	-1.97909	-0.101536	376
AGO3	-0.603544	-0.0318821	358
AGO4	-2.41467	-0.123573	376
AGPAT1	4.43418	0.23094	349
AGPAT2	4.96751	0.251001	367
AGPAT3	2.36153	0.122345	367
AGPAT4	5.78979	0.338519	259
AGPAT5	-3.7056	-0.187705	376
AGPAT6	4.82265	0.241357	376
AGPAT9	4.80293	0.246039	358
AGPS	5.08136	0.253492	376
AGR2	0.278475	0.0143598	376
AGR3	-0.982355	-0.0684497	205
AGRN	13.3156	0.566079	376
AGT	0.425131	0.0396126	115
AGTPBP1	-2.01468	-0.1165	295
AGTRAP	8.69759	0.40926	376
AGXT	-0.0731326	-0.0125412	34
AHCTF1	5.71337	0.282631	376
AHCY	-4.71414	-0.236232	376
AHCYL1	0.96071	0.0494841	376
AHCYL2	-0.121569	-0.00626932	376
AHDC1	2.73764	0.141467	367
AHNAK2	7.19538	0.347894	376
AHR	3.12768	0.15924	376
AHSA1	-6.04371	-0.297562	376
AHSG	2.10752	0.30598	43
AHSP	-3.56433	-0.802964	7
AIDA	5.30206	0.263751	376
AIF1	-3.18784	-0.19764	250
AIF1L	5.77205	0.285299	376
AIFM1	4.07523	0.205671	376
AIFM2	2.10815	0.109384	367
AIM1	2.40142	0.122905	376
AIMP1	-9.83521	-0.452352	376
AIMP2	-4.05436	-0.204662	376
AIP	-9.35642	-0.434575	376
AJUBA	2.92582	0.149199	376
AK1	1.69272	0.0869646	376
AK2	-5.7598	-0.284743	376
AK3	0.904531	0.046597	376
AK4	2.10453	0.107899	376
AK5	0.888726	0.0475187	349
AK6	-2.55984	-0.132445	367
AKAP1	0.376343	0.0194047	376
AKAP10	-0.128772	-0.00689285	349
AKAP11	-0.610462	-0.0314666	376
AKAP12	6.63897	0.323919	376
AKAP13	2.47598	0.126661	376
AKAP17A	0.843571	0.0434628	376
AKAP2	2.51692	0.12872	376
AKAP4	2.05389	0.115318	313
AKAP5	2.93821	0.189411	232
AKAP6	5.281	0.368044	178
AKAP7	-0.465052	-0.0451239	106
AKAP8	-1.1724	-0.0603516	376
AKAP8L	-2.17471	-0.111453	376
AKAP9	2.91716	0.148767	376
AKIP1	-1.61184	-0.161509	97
AKIRIN1	-1.0063	-0.170065	34
AKIRIN2	-1.92523	-0.11491	277
AKNA	-7.53898	-0.424211	259
AKR1A1	-9.36776	-0.435002	376
AKR1B1	0.705404	0.0363544	376
AKR1B10	-0.373369	-0.0202446	340
AKR1B15	-1.76233	-0.0951422	340
AKR1C1	1.81538	0.0932132	376
AKR1C2	0.711089	0.0507267	196
AKR1C3	1.21999	0.0627918	376
AKR1C4	-0.746482	-0.102968	52
AKR1D1	0.386716	0.0221742	304
AKR7A2	-8.3168	-0.394179	376
AKR7A3	-5.02193	-0.307787	241
AKT1	-3.14476	-0.160087	376
AKT1S1	0.155118	0.00799935	376
AKT2	-4.33922	-0.218377	376
AKT3	1.53471	0.0918225	277
AKTIP	1.57759	0.114605	187
ALAD	-5.20434	-0.259219	376
ALAS1	6.09642	0.299925	376
ALDH16A1	-5.59536	-0.277247	376
ALDH18A1	7.59999	0.364912	376
ALDH1A1	-1.30264	-0.0670276	376
ALDH1A2	3.25325	0.165461	376
ALDH1A3	5.79019	0.286122	376
ALDH1B1	3.53601	0.179398	376
ALDH1L1	-2.11122	-0.137296	232
ALDH1L2	1.68046	0.0873835	367
ALDH2	2.32177	0.118887	376
ALDH3A1	-1.43333	-0.0774992	340
ALDH3A2	5.12882	0.255705	376
ALDH3B1	3.16573	0.16502	358
ALDH4A1	1.40016	0.0720203	376
ALDH5A1	-1.49832	-0.0770403	376
ALDH6A1	0.850575	0.0438229	376
ALDH8A1	-0.693586	-0.0957412	52
ALDH9A1	0.022786	0.0011751	376
ALDOA	-6.47415	-0.316693	376
ALDOB	-0.29206	-0.0311187	88
ALDOC	-7.06403	-0.342293	376
ALG1	5.22251	0.260063	376
ALG10	1.36679	0.086122	250
ALG11	4.38061	0.228296	349
ALG12	6.2581	0.351954	277
ALG14	4.64249	0.296869	223
ALG2	6.25148	0.306843	376
ALG3	4.27991	0.228994	331
ALG5	2.2672	0.116131	376
ALG6	4.24765	0.236696	304
ALG8	2.86704	0.164647	295
ALG9	4.1413	0.208861	376
ALK	-0.162014	-0.0172682	88
ALKBH1	0.686788	0.0372205	340
ALKBH2	-3.61155	-0.19471	331
ALKBH3	-5.61864	-0.306719	304
ALKBH4	-6.98786	-0.354376	340
ALKBH5	-2.87446	-0.146636	376
ALKBH6	-2.06463	-0.149289	187
ALKBH7	2.12585	0.117646	322
ALKBH8	-4.65889	-0.297825	223
ALMS1	-1.48056	-0.0846112	304
ALOX15	0.0606616	0.0229219	7
ALOX5	-3.33315	-0.193373	286
ALOX5AP	-5.37358	-0.400662	151
ALPI	1.46469	0.343846	16
ALPK1	-1.52796	-0.207287	52
ALPK2	-3.36875	-0.337978	88
ALPK3	3.09649	0.299927	97
ALPL	3.83913	0.270295	187
ALPP	3.53394	0.201532	295
ALPPL2	1.4439	0.13344	115
ALS2	0.0653035	0.00386145	286
ALS2CL	-0.635732	-0.0713431	79
ALX1	-1.78102	-0.262107	43
ALX4	0.145848	0.0250049	34
ALYREF	-4.56943	-0.229368	376
AMACR	3.52517	0.180974	367
AMBP	1.47646	0.119295	151
AMBRA1	1.56286	0.0813104	367
AMD1	-2.17294	-0.179391	142
AMDHD1	-0.609789	-0.0778386	61
AMDHD2	-3.74196	-0.189481	376
AMER1	1.75386	0.183777	88
AMER2	-0.668191	-0.0621886	115
AMFR	6.27719	0.307986	376
AMIGO2	6.08394	0.321092	322
AMMECR1	-2.61405	-0.152758	286
AMMECR1L	0.0289941	0.00243313	142
AMN1	0.913458	0.0883757	106
AMOT	3.56426	0.194822	322
AMOTL1	4.48664	0.225425	376
AMOTL2	8.318	0.394227	376
AMPD1	-2.32816	-0.25339	79
AMPD2	-3.24921	-0.165261	376
AMPD3	-3.03093	-0.202881	214
AMPH	3.13794	0.167767	340
AMT	-0.613041	-0.0730765	70
AMZ2	-1.69452	-0.10129	277
ANAPC1	-0.665232	-0.0342865	376
ANAPC10	3.95474	0.199836	376
ANAPC11	2.71287	0.175349	232
ANAPC16	-2.49633	-0.134159	340
ANAPC2	1.5995	0.0822088	376
ANAPC4	-0.331598	-0.0170983	376
ANAPC5	-0.730683	-0.0381136	367
ANAPC7	2.47771	0.126747	376
ANG	0.77773	0.0990881	61
ANGEL1	1.24713	0.0887292	196
ANGEL2	3.40617	0.179371	349
ANGPT1	-0.812497	-0.199059	16
ANGPT2	1.62481	0.376338	16
ANGPTL2	2.42125	0.220239	115
ANGPTL3	-1.00878	-0.197771	25
ANGPTL4	0.696775	0.0624502	124
ANK1	-0.670435	-0.0354113	358
ANKEF1	3.44841	0.431417	52
ANKFY1	4.23601	0.213422	376
ANKH	0.535701	0.0373888	205
ANKIB1	7.33084	0.353631	376
ANKK1	-4.94646	-0.320317	214
ANKLE1	-3.03157	-0.36185	61
ANKLE2	5.04739	0.251905	376
ANKMY2	-0.931485	-0.0479823	376
ANKRA2	-1.31253	-0.179072	52
ANKRD10	-4.43656	-0.253753	286
ANKRD11	1.94577	0.0998442	376
ANKRD12	0.390728	0.0227432	295
ANKRD13A	-2.02194	-0.103711	376
ANKRD13B	0.524243	0.0895458	34
ANKRD13C	4.82282	0.525401	61
ANKRD13D	-2.33206	-0.132572	304
ANKRD16	-8.68391	-0.445821	304
ANKRD17	-3.36316	-0.17089	376
ANKRD18B	1.97319	0.216725	79
ANKRD2	2.55952	0.198328	160
ANKRD20A1	-1.59636	-0.236535	43
ANKRD22	0.797444	0.0513002	241
ANKRD24	1.17699	0.131276	79
ANKRD26	4.54008	0.236151	349
ANKRD27	-3.04014	-0.154891	376
ANKRD30A	5.94551	0.33641	277
ANKRD31	-0.333936	-0.0238458	196
ANKRD32	-0.148481	-0.0167031	79
ANKRD35	1.03498	0.086528	142
ANKRD36	0.367098	0.035633	106
ANKRD36C	0.0800589	0.0160097	25
ANKRD39	-4.33964	-0.309318	178
ANKRD40	3.86786	0.197907	367
ANKRD46	3.18251	0.197322	250
ANKRD49	-5.97232	-0.400234	187
ANKRD50	4.29987	0.2271	340
ANKRD52	0.577097	0.0330807	304
ANKRD54	-6.45648	-0.319375	367
ANKS1A	-5.4129	-0.26887	376
ANKS1B	-0.976156	-0.0616202	250
ANKS3	0.599825	0.0519412	133
ANKS4B	-0.936842	-0.0906198	106
ANKS6	-0.504345	-0.0436905	133
ANKZF1	-4.19134	-0.211273	376
ANLN	5.80934	0.286991	376
ANO10	6.09531	0.303196	367
ANO2	2.1454	0.182892	133
ANO6	4.40193	0.221379	376
ANO8	4.16836	0.305331	169
ANO9	1.89984	0.254767	52
ANP32A	-7.18423	-0.34742	376
ANP32B	-7.56656	-0.363519	376
ANP32E	-3.85779	-0.195126	376
ANPEP	0.00814392	0.000419991	376
ANTXR1	7.83365	0.40009	322
ANTXR2	0.563447	0.0301469	349
ANXA1	3.71218	0.188027	376
ANXA10	0.16413	0.0159397	106
ANXA11	-3.79788	-0.192209	376
ANXA13	1.30457	0.0949688	187
ANXA2	8.85861	0.415538	376
ANXA3	2.10963	0.108158	376
ANXA4	1.97389	0.101272	376
ANXA5	1.38525	0.0712573	376
ANXA7	-4.89348	-0.24469	376
ANXA8	2.16065	0.113457	358
ANXA9	3.2917	0.182918	313
AOAH	-1.32699	-0.198343	43
AOC1	-1.20593	-0.0949065	160
AOX1	-0.371317	-0.138983	7
AP1AR	1.38931	0.0732302	358
AP1B1	0.155323	0.00800992	376
AP1G1	2.73559	0.139694	376
AP1G2	-1.58508	-0.082459	367
AP1M1	-0.173277	-0.00893572	376
AP1M2	2.49927	0.127832	376
AP1S1	2.80756	0.143295	376
AP1S2	0.0565601	0.00315195	322
AP1S3	2.42638	0.144262	277
AP2A1	5.3042	0.26385	376
AP2A2	4.63749	0.232601	376
AP2B1	7.22736	0.349252	376
AP2M1	5.98892	0.2951	376
AP2S1	7.38974	0.356113	376
AP3B1	-3.52128	-0.178674	376
AP3B2	0.676358	0.060627	124
AP3D1	-0.997121	-0.0513547	376
AP3M1	-2.76415	-0.141123	376
AP3M2	-2.60846	-0.13657	358
AP3S1	-2.76798	-0.141315	376
AP3S2	0.919825	0.0498225	340
AP4B1	-1.17904	-0.071835	268
AP4E1	-3.66833	-0.200286	322
AP4M1	-3.82969	-0.231501	259
AP4S1	-2.27632	-0.225189	97
AP5B1	0.419386	0.0236984	313
AP5M1	-5.89053	-0.304308	340
AP5S1	-3.72365	-0.200514	331
AP5Z1	-0.672064	-0.0354973	358
APAF1	-6.96864	-0.345609	358
APBA1	3.49234	0.25323	178
APBA2	1.16564	0.0944341	151
APBA3	3.63841	0.232336	232
APBB1	3.74847	0.270487	178
APBB1IP	-8.95732	-0.427883	358
APBB2	4.93376	0.246583	376
APC	3.30683	0.1701	367
APC2	3.66195	0.242833	214
APCDD1	0.188949	0.0377629	25
APEH	-5.88883	-0.290588	376
APEX1	-10.3428	-0.470625	376
APEX2	-2.64012	-0.174096	223
APH1A	9.7273	0.476565	322
APH1B	3.02042	0.293199	97
API5	1.25075	0.0643689	376
APIP	-5.42478	-0.269417	376
APITD1	0.690571	0.0374252	340
APLF	-1.93858	-0.112156	295
APLP1	3.28375	0.346556	79
APLP2	7.01249	0.340086	376
APMAP	8.29117	0.393152	376
APOA1	2.87505	0.205746	187
APOA1BP	-3.52374	-0.178795	376
APOA2	-0.0985493	-0.0126169	61
APOA4	0.0898248	0.0107355	70
APOB	5.63986	0.27928	376
APOBEC2	-0.782193	-0.191913	16
APOBEC3A	4.26243	0.228108	331
APOBEC3B	4.10812	0.243397	268
APOBEC3C	-0.850929	-0.0487461	304
APOBEC3D	1.02231	0.0561029	331
APOBEC3F	1.03081	0.0650559	250
APOBEC3G	0.235664	0.0139338	286
APOBR	-7.14206	-0.438726	214
APOC1	-0.536761	-0.0333341	259
APOC2	-6.16646	-0.438203	160
APOC3	-1.16258	-0.0847108	187
APOD	2.92341	0.173002	277
APOE	0.00407023	0.000209906	376
APOH	6.91195	0.346999	349
APOL1	4.52655	0.301442	205
APOL2	5.85293	0.288965	376
APOL3	-1.58605	-0.146309	115
APOL6	0.941819	0.0842769	124
APOM	-3.8097	-0.238333	241
APOO	2.30639	0.11811	376
APOOL	-0.435021	-0.0224288	376
APOPT1	-0.0176749	-0.00226303	61
APPBP2	-2.19204	-0.180916	142
APPL1	-3.8436	-0.194436	376
APPL2	8.04289	0.38313	376
APRT	-9.47771	-0.439128	376
APTX	0.0732283	0.00377644	376
AQP1	2.60161	0.368778	43
AQP3	1.05499	0.078829	178
AQP5	-1.07344	-0.209906	25
AQPEP	0.854004	0.144914	34
AQR	2.68627	0.137223	376
AR	0.293028	0.035002	70
ARAF	-4.56889	-0.234727	358
ARAP1	-6.12426	-0.30117	376
ARAP2	-0.709524	-0.0594366	142
ARAP3	3.6266	0.235996	223
ARCN1	-2.57802	-0.131791	376
AREG	2.08735	0.150894	187
AREL1	1.35622	0.1306	106
ARF3	-3.06584	-0.156169	376
ARF4	3.11791	0.158755	376
ARF5	0.23598	0.0121688	376
ARF6	0.918937	0.0473374	376
ARFGAP2	-9.7144	-0.447916	376
ARFGEF1	-4.18868	-0.211144	376
ARFGEF2	-1.6451	-0.0845357	376
ARFGEF3	2.00992	0.119893	277
ARFIP1	-0.123583	-0.0063732	376
ARFIP2	2.50176	0.127958	376
ARFRP1	4.8931	0.244673	376
ARG2	1.16159	0.0597971	376
ARGLU1	-3.3511	-0.170296	376
ARHGAP1	-1.58611	-0.0815252	376
ARHGAP10	5.70322	0.28533	367
ARHGAP11A	-1.14296	-0.063566	322
ARHGAP12	4.31655	0.21729	376
ARHGAP15	-9.63508	-0.575976	187
ARHGAP18	-1.47743	-0.0759724	376
ARHGAP19	-4.29511	-0.547924	43
ARHGAP21	8.68945	0.40894	376
ARHGAP22	-0.162965	-0.0158266	106
ARHGAP23	3.02489	0.19853	223
ARHGAP24	-1.61136	-0.134003	142
ARHGAP25	-12.6365	-0.592616	295
ARHGAP26	0.212894	0.0118633	322
ARHGAP27	-7.13253	-0.348916	367
ARHGAP28	-1.55644	-0.122126	160
ARHGAP29	6.39456	0.313184	376
ARHGAP30	-6.72574	-0.450151	178
ARHGAP31	2.25521	0.141203	250
ARHGAP32	3.69804	0.189537	367
ARHGAP35	-0.588981	-0.0303604	376
ARHGAP36	1.08073	0.260829	16
ARHGAP39	4.98086	0.271	313
ARHGAP4	-9.03443	-0.444759	331
ARHGAP42	0.909077	0.0545399	277
ARHGAP5	2.83622	0.144727	376
ARHGAP6	-1.09728	-0.110727	97
ARHGAP8	0.373354	0.0249938	223
ARHGAP9	-6.9096	-0.490126	151
ARHGDIA	-7.14848	-0.345899	376
ARHGDIB	-10.7599	-0.485204	376
ARHGEF1	-9.2499	-0.430549	376
ARHGEF10	4.49319	0.228346	367
ARHGEF10L	-2.84485	-0.190894	214
ARHGEF11	6.35556	0.31146	376
ARHGEF12	4.33202	0.218032	376
ARHGEF16	0.995448	0.0518919	367
ARHGEF17	10.0058	0.45856	376
ARHGEF18	-1.37287	-0.07148	367
ARHGEF2	-7.25684	-0.350502	376
ARHGEF26	3.19279	0.251476	151
ARHGEF28	3.47451	0.185173	340
ARHGEF3	0.577416	0.0648277	79
ARHGEF35	0.206357	0.0777596	7
ARHGEF37	-1.97815	-0.230091	70
ARHGEF38	-2.08903	-0.2288	79
ARHGEF39	0.614737	0.0784663	61
ARHGEF40	5.6321	0.278926	376
ARHGEF5	3.77186	0.193181	367
ARHGEF6	-9.04369	-0.422682	376
ARHGEF7	-5.4426	-0.270237	376
ARID1A	-1.60241	-0.0823571	376
ARID1B	0.228569	0.0117867	376
ARID2	1.68146	0.0863905	376
ARID3A	-3.4768	-0.17857	367
ARID3B	-2.67233	-0.156081	286
ARID4A	2.46771	0.126244	376
ARID4B	7.84037	0.374853	376
ARID5A	-4.91247	-0.532418	61
ARID5B	4.30234	0.236296	313
ARIH1	-1.79059	-0.0919516	376
ARIH2	-4.88557	-0.244319	376
ARL1	6.75297	0.328884	376
ARL10	1.35725	0.143192	88
ARL13B	0.6465	0.0382004	286
ARL14EP	-3.87525	-0.19827	367
ARL15	3.35944	0.176988	349
ARL2	0.253708	0.0130829	376
ARL2BP	-0.878347	-0.0452509	376
ARL3	-3.99215	-0.20165	376
ARL4A	0.223927	0.038375	34
ARL4C	5.57881	0.343924	232
ARL5A	-1.25657	-0.108318	133
ARL5B	2.41276	0.13911	295
ARL6	2.33755	0.132879	304
ARL6IP1	5.68342	0.294553	340
ARL6IP5	7.28592	0.351733	376
ARL6IP6	7.51261	0.369029	358
ARL8A	3.69758	0.191795	358
ARL8B	4.09674	0.20671	376
ARMC1	1.50023	0.0771379	376
ARMC10	4.78566	0.239612	376
ARMC4	-0.459321	-0.0698745	43
ARMC5	-1.89633	-0.167879	124
ARMC6	-9.17723	-0.427788	376
ARMC7	-1.66572	-0.153489	115
ARMC8	0.329313	0.0169806	376
ARMC9	4.00198	0.2121	340
ARMCX1	4.23742	0.24673	277
ARMCX2	4.77531	0.299156	232
ARMCX3	3.41092	0.173245	376
ARMCX5	-1.97235	-0.174408	124
ARNT	1.72217	0.0895353	367
ARNT2	1.18783	0.132464	79
ARNTL	3.78663	0.332958	115
ARNTL2	2.52786	0.307933	61
ARPC1A	4.40384	0.221471	376
ARPC1B	-4.61775	-0.231664	376
ARPC2	-2.7925	-0.142542	376
ARPC3	-5.52844	-0.274182	376
ARPC4	-5.02341	-0.250784	376
ARPC5	-5.06304	-0.252636	376
ARPC5L	-4.48391	-0.225295	376
ARPIN	7.51924	0.361544	376
ARPP19	-10.6145	-0.480167	376
ARPP21	-5.59504	-0.613012	52
ARRB2	-6.89062	-0.334843	376
ARRDC1	-1.38485	-0.0729966	358
ARRDC3	3.24285	0.342749	79
ARSA	4.11771	0.207723	376
ARSB	3.31184	0.168357	376
ARSD	4.15874	0.228829	313
ARSE	2.3484	0.144393	259
ARSG	0.642179	0.109471	34
ARSI	2.75653	0.218884	151
ARSK	3.08092	0.243194	151
ART3	2.61247	0.702617	7
ARV1	4.03761	0.251711	241
ARVCF	7.85916	0.375625	376
ARX	1.72677	0.172693	97
AS3MT	3.39873	0.172644	376
ASAH1	1.89357	0.0971913	376
ASAP1	-2.09633	-0.107484	376
ASAP2	5.5522	0.275271	376
ASAP3	2.10216	0.159631	169
ASB1	1.35626	0.116798	133
ASB13	-1.035	-0.202703	25
ASB3	1.18981	0.125826	88
ASB6	-0.96595	-0.072212	178
ASB7	2.44811	0.252512	88
ASB8	-0.519416	-0.103327	25
ASB9	2.94454	0.168972	295
ASCC1	1.25054	0.0643581	376
ASCC2	0.521081	0.026863	376
ASCC3	0.880913	0.0453828	376
ASCL1	-2.56899	-0.540395	16
ASCL2	-1.37581	-0.325251	16
ASF1A	-1.5774	-0.0810806	376
ASF1B	-3.86081	-0.219312	295
ASGR1	2.56949	0.335652	52
ASGR2	1.19142	0.150801	61
ASH1L	5.07471	0.275721	313
ASH2L	-2.36892	-0.121266	376
ASL	-1.85	-0.0949751	376
ASMTL	-7.84752	-0.375148	376
ASNA1	1.20755	0.0621544	376
ASNS	-6.07661	-0.299037	376
ASPA	-0.128336	-0.0320676	16
ASPH	8.02365	0.382348	376
ASPHD1	3.72711	0.386709	79
ASPHD2	0.499516	0.0561114	79
ASPM	-0.782296	-0.0413104	358
ASPSCR1	-8.44714	-0.399378	376
ASRGL1	-1.62299	-0.0844171	367
ASS1	-2.3622	-0.120927	376
ASTE1	0.936954	0.0993851	88
ASUN	3.30602	0.16807	376
ASXL1	-1.01088	-0.0587542	295
ASXL2	1.45812	0.0749853	376
ASXL3	0.173471	0.0116157	223
ATAD1	2.79246	0.14254	376
ATAD2	0.122209	0.00630233	376
ATAD2B	-0.49613	-0.0255776	376
ATAD3A	0.135125	0.00696836	376
ATAD3B	0.976291	0.0502847	376
ATAD3C	0.432596	0.0225756	367
ATAD5	1.4791	0.0845287	304
ATAT1	0.907876	0.0519998	304
ATF1	-6.69626	-0.337421	349
ATF2	-1.95148	-0.100134	376
ATF3	-0.567898	-0.0358939	250
ATF4	-1.79273	-0.140326	160
ATF5	-4.18753	-0.64207	25
ATF6	5.94747	0.322845	304
ATF6B	3.11218	0.186762	268
ATF7	-2.54426	-0.130095	376
ATF7IP	4.88017	0.244065	376
ATF7IP2	-2.41325	-0.249141	88
ATG10	-0.0427603	-0.0161598	7
ATG101	-0.769134	-0.0428228	322
ATG12	-0.947163	-0.0499965	358
ATG13	-1.55346	-0.0977784	250
ATG14	2.00186	0.125606	250
ATG16L1	1.26412	0.0650541	376
ATG2A	-2.09264	-0.114269	331
ATG2B	-4.63913	-0.238132	358
ATG3	-9.61721	-0.444323	376
ATG4A	-3.10385	-0.226593	178
ATG4B	-7.15588	-0.349919	367
ATG4C	-4.2419	-0.236394	304
ATG4D	-1.44927	-0.197037	52
ATG5	-5.03431	-0.251294	376
ATG7	-4.44132	-0.223262	376
ATG9A	5.69444	0.28177	376
ATG9B	-0.965897	-0.102423	88
ATHL1	-1.72832	-0.18119	88
ATIC	-9.64479	-0.445345	376
ATL1	5.52829	0.280453	358
ATL2	6.84347	0.332807	376
ATL3	6.95842	0.337763	376
ATM	-2.23161	-0.114332	376
ATMIN	0.412093	0.039994	106
ATN1	2.55034	0.131962	367
ATOH1	0.200215	0.0499912	16
ATOX1	-5.4039	-0.271487	367
ATP10A	0.316184	0.030696	106
ATP10B	1.39061	0.328374	16
ATP10D	0.513286	0.0612343	70
ATP11A	3.5028	0.186629	340
ATP11B	2.84411	0.145121	376
ATP11C	1.0422	0.0536701	376
ATP12A	7.94687	0.379217	376
ATP13A1	3.321	0.16881	376
ATP13A2	4.32041	0.240518	304
ATP1A1	7.63855	0.366516	376
ATP1A2	2.39872	0.275599	70
ATP1A3	5.78411	0.285847	376
ATP1A4	7.66574	0.367644	376
ATP1B1	7.7114	0.369536	376
ATP1B3	4.84203	0.242269	376
ATP2A1	-4.35921	-0.32582	160
ATP2A2	9.74945	0.449206	376
ATP2A3	-8.07454	-0.392506	358
ATP2B1	9.87511	0.45381	376
ATP2B2	0.59735	0.063549	88
ATP2B3	0.551064	0.136477	16
ATP2B4	6.43961	0.315172	376
ATP2C1	8.21167	0.389958	376
ATP2C2	-1.41165	-0.130511	115
ATP5A1	2.84597	0.145214	376
ATP5C1	2.05732	0.105506	376
ATP5D	-4.61629	-0.231594	376
ATP5E	2.20157	0.112812	376
ATP5F1	-1.40679	-0.0723596	376
ATP5G2	-2.53742	-0.132917	358
ATP5H	-2.72542	-0.139185	376
ATP5I	4.10203	0.206966	376
ATP5J	-0.584394	-0.0301241	376
ATP5J2-PTCD1	3.76071	0.190396	376
ATP5L	-0.584511	-0.0301302	376
ATP5O	4.10691	0.207201	376
ATP5S	-1.05759	-0.0558081	358
ATP5SL	2.28112	0.116834	376
ATP6AP1	8.19039	0.389101	376
ATP6AP2	8.63524	0.406813	376
ATP6V0A1	6.19527	0.304341	376
ATP6V0A2	3.27008	0.168263	367
ATP6V0A4	0.656416	0.0996048	43
ATP6V0C	2.79038	0.1516	331
ATP6V0D1	6.7909	0.33053	376
ATP6V0D2	1.61683	0.239394	43
ATP6V1A	2.38854	0.122255	376
ATP6V1B1	0.418836	0.0215948	376
ATP6V1B2	-0.265551	-0.0136934	376
ATP6V1C1	-1.7375	-0.0892473	376
ATP6V1C2	-0.614921	-0.0515344	142
ATP6V1D	-2.53604	-0.129682	376
ATP6V1E1	0.275095	0.0141855	376
ATP6V1F	-0.338058	-0.0174314	376
ATP6V1G1	-6.01088	-0.302773	358
ATP6V1G2	-4.52922	-0.389073	115
ATP6V1H	0.22427	0.0115651	376
ATP7A	5.35323	0.266117	376
ATP7B	1.25691	0.0894194	196
ATP8A1	-4.78736	-0.32356	196
ATP8B1	1.70328	0.097227	304
ATP8B2	1.5726	0.233206	43
ATP8B3	2.09004	0.172756	142
ATP9A	7.40835	0.356896	376
ATP9B	1.33409	0.0751936	313
ATPAF1	6.4785	0.316885	376
ATPAF2	7.51246	0.36508	367
ATPIF1	-6.57136	-0.320962	376
ATR	4.1982	0.216614	358
ATRAID	8.97796	0.457795	304
ATRIP	4.18359	0.213353	367
ATRN	11.2028	0.500252	376
ATRNL1	2.34489	0.663275	7
ATXN1	6.80777	0.334848	367
ATXN10	-5.7826	-0.285778	376
ATXN1L	4.18422	0.21093	376
ATXN2L	-7.89126	-0.376942	376
ATXN3	-4.15535	-0.211978	367
ATXN7	-0.879173	-0.0464157	358
ATXN7L1	-0.0304248	-0.00217319	196
ATXN7L2	-1.02306	-0.0949701	115
ATXN7L3	-0.0297778	-0.00168314	313
ATXN7L3B	-6.19535	-0.343983	286
AUH	3.5226	0.178739	376
AUP1	4.85428	0.242846	376
AURKA	0.0297471	0.00153409	376
AURKAIP1	0.293139	0.019242	232
AURKB	1.2283	0.0632182	376
AUTS2	-2.28818	-0.161301	196
AVEN	-8.37834	-0.396639	376
AVIL	-0.085124	-0.0321572	7
AVL9	-4.72618	-0.236802	376
AVP	-0.875699	-0.21386	16
AXIN1	0.458358	0.0266771	295
AXIN2	-0.957971	-0.113756	70
AXL	5.66822	0.290343	349
AZGP1	-0.235668	-0.0135152	304
AZI1	5.20335	0.259173	376
AZI2	-2.22823	-0.126767	304
AZU1	-4.24928	-0.543813	43
B2M	0.319159	0.0164571	376
B3GALNT1	1.3929	0.154824	79
B3GALNT2	2.56098	0.193283	169
B3GALT5	1.56211	0.173098	79
B3GALT6	5.93155	0.31385	322
B3GALTL	7.95806	0.379675	376
B3GAT3	6.17854	0.303595	376
B3GNT1	9.44472	0.451182	349
B3GNT2	-0.0308759	-0.00167448	340
B3GNT3	2.68708	0.159387	277
B3GNT6	-1.34189	-0.318053	16
B3GNT7	0.929719	0.157457	34
B3GNT9	0.28397	0.0319328	79
B3GNTL1	-0.747078	-0.0646444	133
B4GALNT1	2.78773	0.19529	196
B4GALNT2	-0.543446	-0.108053	25
B4GALNT3	1.18462	0.14996	61
B4GALNT4	0.747666	0.271941	7
B4GALT1	7.65878	0.367355	376
B4GALT2	1.40111	0.269827	25
B4GALT3	2.22337	0.11818	349
B4GALT4	6.86578	0.348945	340
B4GALT5	6.86703	0.424931	214
B4GALT6	0.205901	0.0263537	61
B4GALT7	5.76246	0.288049	367
B9D1	2.80053	0.210594	169
B9D2	3.43207	0.329066	97
BAALC	0.951353	0.130796	52
BABAM1	-4.91892	-0.245886	376
BACE1	3.22306	0.246916	160
BACE2	2.44109	0.152581	250
BACH1	-0.957911	-0.0493403	376
BACH2	-5.08352	-0.334585	205
BAD	3.86487	0.195471	376
BAG1	-9.20085	-0.428686	376
BAG2	0.607382	0.031308	376
BAG3	6.57459	0.321104	376
BAG4	-3.56861	-0.180997	376
BAG5	0.428254	0.0220801	376
BAHCC1	2.05597	0.181563	124
BAHD1	-2.89961	-0.168991	286
BAI1	-0.470581	-0.0715789	43
BAIAP2L1	6.55922	0.32043	376
BAIAP2L2	-0.448965	-0.0402855	124
BAK1	5.93331	0.299218	358
BANF1	-1.28271	-0.0660067	376
BANK1	-6.74229	-0.604359	79
BANP	1.45888	0.0750242	376
BAP1	6.42789	0.314655	376
BAP18	-6.03621	-0.297225	376
BARD1	-1.3666	-0.0729577	349
BARHL2	0.739895	0.181888	16
BASP1	2.25202	0.115364	376
BAX	-2.65905	-0.135859	376
BAZ1A	1.73376	0.0890564	376
BAZ1B	3.11289	0.158505	376
BAZ2A	5.07395	0.253146	376
BBC3	-3.95857	-0.227914	286
BBOX1	-1.54459	-0.295155	25
BBS1	3.22217	0.324855	88
BBS2	4.67937	0.346957	160
BBS4	3.55433	0.354313	88
BBS7	0.603015	0.0522167	133
BBS9	-2.29897	-0.17882	160
BBX	0.797588	0.0410977	376
BCAM	8.33756	0.39501	376
BCAN	-0.00556259	-0.000848287	43
BCAP29	8.6032	0.405552	376
BCAP31	8.25399	0.391661	376
BCAR1	4.91318	0.245616	376
BCAR3	3.86318	0.197677	367
BCAS2	1.29407	0.0665884	376
BCAS3	-1.38906	-0.076128	331
BCAS4	-0.578448	-0.0456826	160
BCAT1	-4.61437	-0.234171	367
BCAT2	1.77953	0.0913883	376
BCDIN3D	-3.42994	-0.343398	88
BCHE	3.54552	0.215148	259
BCKDHA	-0.672287	-0.0346497	376
BCKDHB	0.748366	0.0385653	376
BCKDK	5.48366	0.275193	367
BCL10	-7.50931	-0.361129	376
BCL11A	-6.15604	-0.36862	241
BCL11B	-3.58388	-0.213856	268
BCL2	-4.6491	-0.329059	178
BCL2A1	-4.14941	-0.719949	16
BCL2L1	3.43107	0.178428	358
BCL2L11	-6.0528	-0.375641	223
BCL2L12	7.11807	0.352109	358
BCL2L13	8.26829	0.392235	376
BCL2L14	-0.510673	-0.0652457	61
BCL2L15	-1.33154	-0.0906476	214
BCL2L2	-1.3405	-0.0689664	376
BCL3	-0.835051	-0.0485612	295
BCL6	-0.97311	-0.0983255	97
BCL7B	0.892298	0.0465271	367
BCL7C	1.8009	0.0924764	376
BCL9	1.68948	0.0900684	349
BCL9L	3.06912	0.156332	376
BCLAF1	0.178728	0.00921679	376
BCOR	-2.02443	-0.106387	358
BCORL1	-0.256442	-0.0135521	358
BCR	-4.57146	-0.229464	376
BCS1L	0.626091	0.0322714	376
BDH1	-3.07072	-0.156411	376
BDH2	-0.0620471	-0.00332129	349
BDP1	0.608851	0.0365579	277
BECN1	-1.90256	-0.0976482	376
BEND3	1.82152	0.0935258	376
BEND5	-2.54902	-0.183246	187
BEND7	1.56254	0.298282	25
BET1	4.8317	0.287548	259
BET1L	4.75902	0.263316	304
BEX1	-0.0832824	-0.0208161	16
BEX2	3.82058	0.822118	7
BFAR	2.63513	0.284246	79
BGN	3.00056	0.189771	241
BHLHE22	0.872817	0.148038	34
BHLHE40	4.08963	0.25041	250
BHLHE41	4.13978	0.272296	214
BHMT	-1.4728	-0.102325	205
BHMT2	2.02051	0.294464	43
BICC1	2.93789	0.196898	214
BICD1	5.62015	0.281505	367
BICD2	4.69422	0.23529	376
BID	-8.95106	-0.423313	367
BIN2	-7.58	-0.476121	196
BIN3	-3.23635	-0.164625	376
BIRC2	-4.13657	-0.208633	376
BIRC5	-3.57605	-0.183499	367
BIRC6	-4.17204	-0.210343	376
BIRC7	-1.88417	-0.19692	88
BLM	-2.77892	-0.141862	376
BLMH	-2.6989	-0.137856	376
BLNK	-7.0395	-0.466658	178
BLOC1S1	-6.03441	-0.297145	376
BLOC1S2	-6.07795	-0.305838	358
BLOC1S3	-11.5666	-0.512284	376
BLOC1S4	-10.7439	-0.489153	367
BLOC1S5	-12.9801	-0.560925	367
BLOC1S6	-8.29193	-0.501157	205
BLVRA	0.20027	0.0103276	376
BLVRB	-5.7944	-0.286313	376
BLZF1	5.96402	0.307747	340
BMF	-4.10152	-0.384442	97
BMP1	4.2366	0.302654	178
BMP10	0.0714769	0.0270059	7
BMP2K	1.19176	0.0613448	376
BMP4	0.0115188	0.00116956	97
BMP5	1.05073	0.254064	16
BMP6	0.928973	0.226223	16
BMP7	0.84444	0.143325	34
BMP8B	1.3522	0.320247	16
BMPR1A	10.4571	0.598427	196
BMPR2	8.19666	0.406201	340
BMS1	4.36506	0.219615	376
BMX	-1.0697	-0.374832	7
BNC1	2.76358	0.313644	70
BNC2	2.91324	0.253098	124
BNIP1	4.0769	0.205752	376
BNIP2	-4.74309	-0.274073	277
BNIP3	2.31043	0.133318	295
BNIP3L	2.15374	0.113099	358
BOC	0.562948	0.111883	25
BOD1	4.41634	0.224639	367
BOD1L1	0.693643	0.035749	376
BOK	4.63438	0.335791	169
BOLA1	-3.19104	-0.162381	376
BOLA2	-10.9494	-0.491699	376
BOLA3	2.13952	0.109672	376
BOP	-4.8165	-0.409713	115
BOP1	3.78171	0.19142	376
BORA	-2.19898	-0.240164	79
BPGM	-2.72349	-0.14075	367
BPHL	5.09069	0.253928	376
BPI	-1.51881	-0.354975	16
BPIFB1	-0.634046	-0.0962423	43
BPIFB2	-0.530833	-0.0734147	52
BRAF	-7.49275	-0.364249	367
BRAP	-7.98969	-0.380965	376
BRAT1	-1.39209	-0.0724754	367
BRCA1	-1.75036	-0.0899024	376
BRCA2	0.772483	0.0442615	304
BRCC3	-1.40461	-0.0722481	376
BRD1	1.76918	0.0908609	376
BRD2	2.92074	0.148945	376
BRD3	0.50484	0.0260263	376
BRD4	-1.70475	-0.0875781	376
BRD8	4.311	0.217024	376
BRD9	-5.55423	-0.275364	376
BRDT	0.997511	0.126689	61
BRE	-4.65655	-0.233505	376
BRF1	-3.28361	-0.173114	349
BRF2	-3.72733	-0.353953	97
BRI3	5.23623	0.319604	241
BRI3BP	1.19554	0.0615382	376
BRIP1	-1.61635	-0.103559	241
BRIX1	4.75122	0.237986	376
BRK1	0.182224	0.00939707	376
BRMS1	2.25276	0.118227	358
BRMS1L	7.48615	0.363971	367
BROX	-5.22507	-0.260182	376
BRPF1	-0.896067	-0.0461619	376
BRPF3	2.60127	0.139691	340
BRSK1	1.92557	0.239376	61
BRSK2	-0.0676672	-0.00761293	79
BRWD1	3.09903	0.159692	367
BRWD3	0.694801	0.0548462	160
BSCL2	2.22703	0.153694	205
BSG	6.20007	0.304555	376
BSN	-3.57539	-0.279375	151
BSPRY	0.904334	0.0489855	340
BST1	0.61656	0.0382831	259
BST2	0.912757	0.0470198	376
BTAF1	-4.31637	-0.217282	376
BTBD1	2.38078	0.151587	241
BTBD10	0.577759	0.0469655	151
BTBD11	2.3651	0.223887	106
BTBD2	4.32168	0.23111	331
BTBD3	0.791926	0.194212	16
BTBD9	2.95953	0.300869	88
BTD	4.84213	0.242274	376
BTF3	-10.6639	-0.481884	376
BTF3L4	-8.06371	-0.383976	376
BTG3	2.3387	0.241902	88
BTK	-7.03927	-0.36519	322
BTN2A1	8.16653	0.388139	376
BTN3A1	-0.631736	-0.0640115	97
BTN3A2	2.31433	0.170914	178
BTN3A3	3.3435	0.176174	349
BTRC	2.56826	0.14168	322
BUB1	-2.25656	-0.119919	349
BUB1B	-6.74214	-0.328414	376
BUB3	-1.60286	-0.0823801	376
BUD13	-3.15819	-0.160753	376
BUD31	-2.44995	-0.12535	376
BYSL	-1.17556	-0.0605139	376
BZRAP1	-0.947184	-0.120392	61
BZW1	-3.32241	-0.168879	376
BZW2	-5.54203	-0.274805	376
C10orf11	0.174665	0.0127717	187
C10orf118	1.57439	0.0819065	367
C10orf12	-0.0413984	-0.00218797	358
C10orf32	-3.28678	-0.167119	376
C10orf35	6.17666	0.353009	268
C10orf54	0.262604	0.0157764	277
C10orf71	1.68872	0.278182	34
C10orf76	0.10577	0.00552109	367
C10orf88	1.10266	0.0695691	250
C11orf52	2.2346	0.173967	160
C11orf54	-10.5023	-0.476247	376
C11orf57	-1.81405	-0.106655	286
C11orf68	-3.82537	-0.193548	376
C11orf73	-7.16658	-0.346669	376
C11orf83	1.57784	0.0975746	259
C11orf84	1.96159	0.100647	376
C11orf95	0.851297	0.117239	52
C11orf96	-1.87804	-0.187311	97
C12orf10	-7.99149	-0.381038	376
C12orf23	-5.86104	-0.289332	376
C12orf29	-5.30128	-0.266701	367
C12orf39	-0.958882	-0.101687	88
C12orf4	-0.973831	-0.0678585	205
C12orf43	-2.41472	-0.123575	376
C12orf45	-6.1781	-0.303575	376
C12orf57	-1.55271	-0.0807859	367
C12orf65	-6.17235	-0.347718	277
C12orf66	-0.432427	-0.0388039	124
C12orf73	1.02866	0.0580454	313
C14orf1	4.46025	0.232225	349
C14orf119	-2.99718	-0.156455	358
C14orf142	-8.47801	-0.486346	232
C14orf159	-0.509697	-0.0262765	376
C14orf166	2.20022	0.112744	376
C14orf80	-0.592884	-0.0665568	79
C14orf93	1.03875	0.0708293	214
C15orf39	-4.75446	-0.252838	331
C15orf40	-8.27558	-0.396563	367
C15orf41	-2.07692	-0.177241	133
C15orf52	6.72061	0.327478	376
C15orf57	-3.2479	-0.212527	223
C15orf61	-0.681047	-0.0811323	70
C16orf13	-8.37777	-0.396616	376
C16orf45	3.98873	0.519685	43
C16orf54	-2.86165	-0.496728	25
C16orf58	5.62455	0.278581	376
C16orf59	-0.37402	-0.039839	88
C16orf62	-0.0620565	-0.00320031	376
C16orf70	-1.49421	-0.0818538	331
C16orf72	0.500448	0.0466163	115
C16orf74	2.21906	0.294117	52
C16orf80	2.44766	0.125235	376
C16orf86	-3.20167	-0.539254	25
C16orf87	-3.66384	-0.247906	205
C16orf96	0.558959	0.0566625	97
C17orf104	0.798347	0.110039	52
C17orf49	-4.69068	-0.243527	349
C17orf53	-5.26831	-0.455529	106
C17orf59	-3.26556	-0.16607	376
C17orf62	2.85326	0.147314	367
C17orf75	0.855321	0.0440669	376
C17orf80	0.437345	0.0237117	340
C17orf85	1.33861	0.0688699	376
C17orf89	4.14808	0.404413	88
C17orf96	-5.01662	-0.377963	151
C17orf97	-1.59753	-0.104311	232
C18orf21	0.644645	0.0359015	322
C18orf25	-1.3888	-0.0723051	367
C18orf32	1.24952	0.0714814	304
C18orf8	-2.25357	-0.11683	367
C19orf10	5.1713	0.257683	376
C19orf12	1.75251	0.127117	187
C19orf25	-0.903274	-0.0465323	376
C19orf43	-11.8161	-0.520368	376
C19orf44	-0.729709	-0.124175	34
C19orf47	1.47956	0.0770031	367
C19orf52	1.24532	0.0648684	367
C19orf53	-3.40423	-0.179272	349
C19orf54	-9.66027	-0.51466	259
C19orf55	-5.44403	-0.545393	70
C19orf60	1.27615	0.118168	115
C19orf66	-8.85539	-0.415413	376
C19orf68	1.22869	0.0874278	196
C1D	1.35936	0.0735222	340
C1GALT1	6.88377	0.334547	376
C1GALT1C1	6.00582	0.309698	340
C1orf106	2.88627	0.173629	268
C1orf109	-2.88587	-0.168214	286
C1orf112	0.412738	0.0357661	133
C1orf122	-5.51933	-0.305939	295
C1orf123	-11.7495	-0.518222	376
C1orf159	0.643918	0.0539577	142
C1orf172	2.99381	0.189359	241
C1orf174	-2.46321	-0.127529	367
C1orf198	1.2067	0.0621105	376
C1orf21	2.14169	0.134227	250
C1orf210	0.477843	0.0508722	88
C1orf226	4.70425	0.264163	295
C1orf43	5.13837	0.286616	295
C1orf50	-7.29739	-0.363847	349
C1orf52	-6.14067	-0.301904	376
C1orf53	1.42112	0.142814	97
C1orf85	3.26026	0.18649	295
C1QBP	-0.848673	-0.0437251	376
C1QL1	0.397702	0.0605377	43
C1QTNF6	4.49316	0.473125	70
C1R	5.84547	0.346761	250
C1RL	5.56584	0.349247	223
C1S	3.90892	0.274841	187
C2	-1.10847	-0.166675	43
C20orf112	3.15006	0.16035	376
C20orf24	7.62738	0.369905	367
C20orf27	-4.4457	-0.237373	331
C21orf2	0.176382	0.0164455	115
C21orf33	-2.94537	-0.150173	376
C21orf59	-9.22732	-0.429692	376
C22orf39	-7.17427	-0.433042	223
C2CD2	4.21937	0.228894	322
C2CD2L	-0.734577	-0.0420935	304
C2CD3	-0.194914	-0.0146079	178
C2CD4C	0.960206	0.188595	25
C2CD5	-1.08565	-0.0559007	376
C2orf42	0.67201	0.0753918	79
C2orf43	-2.30606	-0.118094	376
C2orf44	-4.81194	-0.252508	340
C2orf47	3.54511	0.179844	376
C2orf49	-5.33046	-0.265065	376
C2orf54	-0.835812	-0.115135	52
C2orf68	-7.25517	-0.47773	178
C2orf69	0.755714	0.0389434	376
C2orf72	1.46112	0.114748	160
C2orf74	-3.15325	-0.533431	25
C2orf76	-5.57522	-0.362852	205
C2orf88	-1.87757	-0.206682	79
C3	2.39573	0.127199	349
C3orf14	4.10413	0.494639	52
C3orf17	2.60217	0.133005	376
C3orf20	-0.485747	-0.0435799	124
C3orf33	1.34066	0.099983	178
C3orf38	-2.87581	-0.146704	376
C3orf58	1.23828	0.0645033	367
C4A	2.33711	0.119661	376
C4BPA	-2.74337	-0.217889	151
C4orf21	-2.2651	-0.261323	70
C4orf27	-5.74982	-0.284289	376
C4orf3	3.73371	0.209396	304
C4orf32	-0.335058	-0.0195041	295
C4orf33	-2.25486	-0.180485	151
C4orf48	1.04391	0.13248	61
C5	-1.57207	-0.174168	79
C5orf22	-1.53292	-0.0797629	367
C5orf24	-1.1378	-0.0585766	376
C5orf28	2.48886	0.179062	187
C5orf30	-3.47074	-0.271811	151
C5orf42	-0.138137	-0.0155398	79
C5orf45	-3.485	-0.246955	187
C5orf51	-4.05923	-0.207288	367
C6orf106	-5.80638	-0.296803	349
C6orf132	2.94361	0.150085	376
C6orf136	1.57134	0.14498	115
C6orf141	0.159547	0.0221198	52
C6orf203	-1.54326	-0.0938536	268
C6orf211	-4.67633	-0.234442	376
C6orf47	4.40908	0.229702	349
C6orf57	-0.812754	-0.0434646	349
C6orf89	5.47346	0.284567	340
C7	1.37517	0.118404	133
C7orf10	4.10091	0.269927	214
C7orf25	-0.402275	-0.0212561	358
C7orf26	0.961953	0.060727	250
C7orf43	-0.889811	-0.0572239	241
C7orf50	3.7468	0.189717	376
C7orf55	-1.06156	-0.0695259	232
C7orf60	-0.691078	-0.0823192	70
C8orf33	-7.14602	-0.345793	376
C8orf37	-4.41548	-0.28896	214
C8orf47	1.96812	0.139211	196
C8orf59	-2.73119	-0.14114	367
C8orf76	-3.89575	-0.422114	70
C8orf82	-0.0215663	-0.0011122	376
C9	-1.02545	-0.0991097	106
C9orf114	1.60294	0.0823841	376
C9orf142	-7.61164	-0.365397	376
C9orf156	-1.14653	-0.192934	34
C9orf169	0.168294	0.0420363	16
C9orf40	-8.21106	-0.460873	250
C9orf41	-3.47948	-0.187845	331
C9orf64	-3.53137	-0.179169	376
C9orf72	-2.46716	-0.233034	106
C9orf78	-8.46603	-0.400128	376
C9orf85	-3.31993	-0.268381	142
C9orf89	3.88952	0.196669	376
C9orf91	1.29369	0.119769	115
CA1	-3.33853	-0.169675	376
CA12	3.26625	0.179079	322
CA13	-1.44237	-0.0779851	340
CA14	0.666458	0.0645969	106
CA2	-3.60579	-0.182821	376
CA3	-0.704959	-0.0655961	115
CA4	1.56214	0.258779	34
CA5A	-1.01963	-0.247008	16
CA5B	3.24696	0.191481	277
CA8	-1.85781	-0.101586	331
CA9	1.19961	0.078515	232
CAAP1	-2.71331	-0.138578	376
CAB39	-6.56151	-0.32053	376
CAB39L	-2.71291	-0.190241	196
CABIN1	-0.979019	-0.0504248	376
CABLES1	2.49494	0.143752	295
CABLES2	1.17369	0.148608	61
CABP1	-1.20783	-0.415287	7
CACFD1	5.18659	0.379382	160
CACHD1	1.90483	0.144978	169
CACNA1A	-0.992903	-0.167865	34
CACNA1C	0.556396	0.0769296	52
CACNA1F	1.9042	0.148863	160
CACNA2D2	3.16968	0.265018	133
CACNB2	0.499273	0.0595686	70
CACNB3	2.21907	0.355681	34
CACTIN	2.33344	0.120911	367
CACUL1	4.34204	0.22367	358
CACYBP	-8.41454	-0.398081	376
CAD	-8.8921	-0.416836	376
CADM1	4.72121	0.236567	376
CADM2	1.05094	0.101549	106
CADM3	1.84494	0.215339	70
CADM4	7.79872	0.377045	367
CADPS2	-2.13986	-0.203493	106
CALB1	-0.590969	-0.0495321	142
CALB2	0.311445	0.0162552	367
CALCB	0.45918	0.114046	16
CALCOCO1	-2.0288	-0.10406	376
CALCOCO2	0.611668	0.0315287	376
CALCRL	-0.254523	-0.0635023	16
CALHM2	1.7759	0.334695	25
CALM2	-6.75451	-0.328951	376
CALML3	-6.9966	-0.372417	304
CALML4	-1.68875	-0.140315	142
CALR	4.21727	0.212521	376
CAMK1	-0.439652	-0.0259884	286
CAMK1D	-3.64128	-0.18673	367
CAMK2B	1.14448	0.0589198	376
CAMK2D	1.23894	0.0637635	376
CAMK4	0.717885	0.0438097	268
CAMKK1	1.10826	0.0789149	196
CAMKK2	-7.01713	-0.351631	349
CAMKMT	-5.26958	-0.306408	268
CAMKV	-0.50575	-0.086411	34
CAMLG	5.45138	0.270642	376
CAMSAP1	-2.73956	-0.139893	376
CAMSAP2	5.09713	0.254228	376
CAMSAP3	0.315932	0.0164893	367
CAND1	-3.45596	-0.175462	376
CAND2	-3.09842	-0.157787	376
CANT1	5.44712	0.270446	376
CANX	7.28162	0.351551	376
CAP1	-3.11205	-0.158464	376
CAP2	5.11893	0.255244	376
CAPG	-2.10762	-0.108056	376
CAPN1	-4.34419	-0.218616	376
CAPN13	0.769392	0.0915736	70
CAPN15	-6.64756	-0.35625	304
CAPN2	2.64139	0.134973	376
CAPN5	4.08748	0.208668	367
CAPN6	1.70158	0.25117	43
CAPN7	-7.43743	-0.361913	367
CAPN8	-1.36297	-0.185722	52
CAPN9	-0.976652	-0.237195	16
CAPNS1	-1.5245	-0.0783785	376
CAPRIN1	-2.21803	-0.113645	376
CAPRIN2	1.19226	0.200325	34
CAPS	4.05454	0.207059	367
CAPZA1	-4.31121	-0.217034	376
CAPZA2	3.19471	0.162563	376
CARD10	4.74399	0.278335	268
CARD11	-1.48589	-0.0919374	259
CARD14	0.0919078	0.0109844	70
CARD16	-3.70968	-0.250814	205
CARD17	1.02691	0.201183	25
CARD6	-3.5563	-0.339625	97
CARD8	-8.77103	-0.48509	250
CARD9	-4.68277	-0.466118	79
CARHSP1	-7.95663	-0.379616	376
CARM1	-5.00147	-0.249757	376
CARS	-6.73377	-0.32805	376
CARS2	0.986713	0.0508201	376
CASC3	-8.78451	-0.412656	376
CASC4	9.97655	0.4575	376
CASC5	-2.50047	-0.127893	376
CASD1	4.947	0.486328	79
CASK	10.0123	0.458796	376
CASKIN1	2.8909	0.179855	250
CASKIN2	-0.283301	-0.0146086	376
CASP1	-4.45577	-0.229224	358
CASP10	-5.89437	-0.343917	259
CASP2	-5.82168	-0.28755	376
CASP3	-7.12498	-0.344897	376
CASP4	-2.09532	-0.107433	376
CASP5	-1.3564	-0.0923256	214
CASP6	-3.87372	-0.195901	376
CASP7	-4.80749	-0.240642	376
CASP8	-6.28041	-0.308129	376
CASP8AP2	-0.32968	-0.0191912	295
CASP9	-7.46351	-0.40918	277
CASZ1	1.93969	0.106014	331
CAT	-3.59036	-0.182064	376
CAV1	7.9651	0.379962	376
CAV2	6.74942	0.32873	376
CBFA2T2	-1.15226	-0.0659431	304
CBFA2T3	-6.96836	-0.462957	178
CBL	-8.00205	-0.381469	376
CBLB	-3.14128	-0.17731	304
CBLL1	-3.1973	-0.162691	376
CBR1	-1.21764	-0.0626718	376
CBR3	0.634881	0.032724	376
CBR4	0.717885	0.0369967	376
CBS	0.107341	0.00553561	376
CBWD1	-7.64187	-0.366653	376
CBWD2	-2.53232	-0.214471	133
CBX1	-0.152697	-0.00787449	376
CBX2	0.827531	0.0448341	340
CBX3	-5.04904	-0.251982	376
CBX4	-0.982035	-0.0505797	376
CBX5	-3.05918	-0.155838	376
CBX6	3.55881	0.219585	250
CBX7	2.71658	0.292291	79
CBX8	1.93757	0.0994273	376
CBY1	5.87626	0.495697	106
CC2D1A	-0.529482	-0.0272958	376
CC2D1B	-1.27518	-0.0656205	376
CC2D2A	2.12897	0.283152	52
CCAR1	1.69033	0.0868426	376
CCAR2	1.04656	0.0538938	376
CCBE1	1.56217	0.173104	79
CCBL1	-5.36579	-0.290237	313
CCBL2	-1.29599	-0.0666868	376
CCDC101	1.02013	0.0525364	376
CCDC102A	3.3964	0.181148	340
CCDC102B	-2.1947	-0.352262	34
CCDC104	-1.78928	-0.0953419	349
CCDC106	1.64107	0.111482	214
CCDC109B	3.18625	0.164067	367
CCDC112	-1.00872	-0.138535	52
CCDC115	5.12669	0.255606	376
CCDC117	-5.16829	-0.257543	376
CCDC12	-7.89737	-0.377192	376
CCDC120	3.35634	0.200843	268
CCDC124	-10.32	-0.469818	376
CCDC126	4.91204	0.318315	214
CCDC127	3.44647	0.174995	376
CCDC130	-3.1781	-0.184692	286
CCDC132	-4.21266	-0.212299	376
CCDC134	5.39476	0.268034	376
CCDC137	-1.31713	-0.0677697	376
CCDC138	2.46413	0.191212	160
CCDC14	4.07025	0.233997	286
CCDC141	2.95901	0.276223	106
CCDC144A	3.02321	0.38664	52
CCDC147	-0.837544	-0.0938154	79
CCDC149	1.63553	0.191852	70
CCDC15	-2.45397	-0.208126	133
CCDC150	-6.44977	-0.330172	340
CCDC154	0.795288	0.0665909	142
CCDC167	1.57414	0.0862008	331
CCDC168	4.36529	0.304103	187
CCDC174	-9.70757	-0.45201	367
CCDC175	0.308941	0.0185592	277
CCDC177	1.53097	0.500845	7
CCDC18	-1.90923	-0.158201	142
CCDC180	-0.172655	-0.0206318	70
CCDC19	3.74617	0.355517	97
CCDC22	-0.733401	-0.0377952	376
CCDC23	-6.84251	-0.391276	259
CCDC25	-11.8911	-0.522769	376
CCDC28A	-4.09976	-0.246863	259
CCDC28B	-3.27022	-0.250304	160
CCDC34	1.17875	0.406963	7
CCDC37	-1.2379	-0.0678845	331
CCDC41	-3.27973	-0.190387	286
CCDC43	-8.20329	-0.389621	376
CCDC47	8.69362	0.409104	376
CCDC51	3.45484	0.175407	376
CCDC53	-0.645847	-0.0332886	376
CCDC57	0.91075	0.0529515	295
CCDC58	-2.11835	-0.108599	376
CCDC59	-2.14288	-0.109842	376
CCDC6	-2.89864	-0.147843	376
CCDC60	-1.53507	-0.20821	52
CCDC61	-1.96954	-0.119448	268
CCDC64	0.760735	0.104913	52
CCDC64B	1.23536	0.0841481	214
CCDC66	0.694708	0.105352	43
CCDC69	-3.52789	-0.411653	61
CCDC71	7.27611	0.424394	241
CCDC71L	2.49416	0.141608	304
CCDC77	1.12733	0.0752771	223
CCDC8	1.59985	0.111047	205
CCDC80	2.63159	0.229988	124
CCDC82	-0.268601	-0.014762	331
CCDC84	-1.57105	-0.0884527	313
CCDC85B	-1.26898	-0.0715433	313
CCDC85C	2.02919	0.110847	331
CCDC86	-3.56291	-0.180718	376
CCDC88A	-0.281767	-0.0145295	376
CCDC88B	-10.0369	-0.557828	223
CCDC88C	-3.06149	-0.155952	376
CCDC9	-9.37736	-0.435363	376
CCDC90B	4.77115	0.238927	376
CCDC91	-4.9846	-0.248967	376
CCDC92	2.31731	0.156457	214
CCDC93	-0.86631	-0.044632	376
CCDC94	-7.93891	-0.378892	376
CCDC97	-0.627591	-0.0323486	376
CCHCR1	-1.62296	-0.155713	106
CCL20	-1.20047	-0.164215	52
CCL26	1.09108	0.381242	7
CCL5	-0.616358	-0.057381	115
CCM2	-2.3932	-0.12249	376
CCNA1	-3.71488	-0.596386	25
CCNA2	-4.79431	-0.24002	376
CCNB1	-1.81897	-0.093396	376
CCNB2	-2.42473	-0.128713	349
CCNB3	2.40117	0.203837	133
CCNC	2.23958	0.131283	286
CCND1	5.12958	0.26478	349
CCND2	-1.93683	-0.283266	43
CCND3	-1.28517	-0.0983799	169
CCNDBP1	-0.649429	-0.0425984	232
CCNE1	2.57241	0.252711	97
CCNE2	0.0933257	0.0142306	43
CCNH	3.89114	0.196748	376
CCNI	0.811281	0.293163	7
CCNK	5.6942	0.281758	376
CCNL1	2.87563	0.150256	358
CCNL2	-1.00799	-0.0585865	295
CCNT1	0.874429	0.0450494	376
CCNT2	3.12187	0.169122	331
CCNY	4.02432	0.215976	331
CCNYL1	7.27307	0.362794	349
CCP110	-5.78533	-0.303038	331
CCPG1	5.35017	0.265975	376
CCRL2	-0.197394	-0.0191691	106
CCRN4L	2.84246	0.158631	313
CCS	-6.93708	-0.336845	376
CCSAP	-4.89163	-0.429143	106
CCSER1	-0.397515	-0.0550418	52
CCSER2	1.16941	0.0724726	259
CCSMST1	3.93489	0.223313	295
CCT2	-1.82191	-0.0935461	376
CCT3	-1.25783	-0.0647315	376
CCT4	-5.11291	-0.254964	376
CCT5	-0.934686	-0.0481469	376
CCT6A	-0.591301	-0.0304799	376
CCT7	-2.08132	-0.106723	376
CCT8	-2.42074	-0.123878	376
CCZ1	-0.964947	-0.0497019	376
CD101	-1.76769	-0.404211	16
CD109	6.97374	0.338422	376
CD14	1.70415	0.113383	223
CD151	9.18192	0.436588	358
CD177	1.46418	0.281035	25
CD180	-1.92533	-0.20105	88
CD19	-5.60234	-0.613511	52
CD1B	-1.01866	-0.359306	7
CD200	0.386256	0.0434163	79
CD200R1	-0.508888	-0.126205	16
CD22	-6.30643	-0.436464	169
CD248	1.09878	0.122688	79
CD27	-3.09327	-0.468632	34
CD274	4.46499	0.235346	340
CD2AP	-7.41025	-0.356976	376
CD2BP2	-1.16724	-0.0600868	376
CD300A	-6.05854	-0.678614	43
CD320	3.83587	0.196334	367
CD33	-3.27939	-0.238696	178
CD34	-1.68802	-0.278075	34
CD36	-0.662476	-0.0434526	232
CD37	-4.54581	-0.403909	106
CD38	-7.5265	-0.396325	304
CD3EAP	-3.14158	-0.159929	376
CD4	-3.13511	-0.372518	61
CD40	-0.40694	-0.0215025	358
CD44	5.09625	0.254187	376
CD47	1.91355	0.0982066	376
CD48	-7.42237	-0.620491	88
CD53	-8.40057	-0.64895	97
CD55	3.00124	0.152956	376
CD58	5.60464	0.277671	376
CD59	9.35279	0.434438	376
CD63	4.86438	0.243322	376
CD69	-1.47272	-0.282543	25
CD7	-0.195008	-0.0233015	70
CD70	0.260871	0.0178299	214
CD72	-5.52056	-0.60788	52
CD74	-6.00383	-0.295771	376
CD79A	-8.14655	-0.590444	124
CD79B	-7.66065	-0.529031	151
CD81	4.68731	0.237665	367
CD82	-1.13226	-0.0604974	349
CD83	0.849752	0.101045	70
CD84	-7.19798	-0.572984	106
CD86	-5.76466	-0.593849	61
CD9	6.08227	0.299291	376
CD93	-0.62721	-0.0495244	160
CD96	-2.56592	-0.335239	52
CD97	1.10894	0.0570959	376
CD99	7.50237	0.360839	376
CD99L2	4.17998	0.215717	358
CDA	1.59688	0.0820749	376
CDAN1	-3.83117	-0.248506	223
CDC123	-1.80521	-0.0926959	376
CDC16	-0.0328372	-0.00169344	376
CDC20	-0.969687	-0.0499454	376
CDC23	1.37609	0.0707886	376
CDC25B	-1.78894	-0.110479	259
CDC25C	-3.35319	-0.178918	340
CDC26	-3.16161	-0.160922	376
CDC27	3.11933	0.158825	376
CDC34	-4.9891	-0.254968	358
CDC37	-5.99391	-0.295325	376
CDC37L1	-2.80563	-0.148516	349
CDC40	2.47872	0.126799	376
CDC42BPA	7.13098	0.345153	376
CDC42BPB	8.18837	0.389019	376
CDC42BPG	2.61373	0.155142	277
CDC42EP1	6.98663	0.338976	376
CDC42EP2	1.72964	0.101745	286
CDC42EP3	2.3683	0.129084	331
CDC42EP4	4.57015	0.229402	376
CDC42EP5	-1.34337	-0.108675	151
CDC42SE1	-0.0349413	-0.00261895	178
CDC42SE2	-0.241082	-0.0147248	268
CDC45	-5.2943	-0.303136	277
CDC5L	3.14428	0.160063	376
CDC6	-0.751234	-0.0760553	97
CDC7	-0.601028	-0.0360888	277
CDC73	6.14273	0.301996	376
CDCA2	-1.77655	-0.0912363	376
CDCA3	-3.10673	-0.160079	367
CDCA4	0.578	0.0469851	151
CDCA5	-4.56355	-0.229088	376
CDCA7	0.272417	0.0186188	214
CDCA7L	0.194815	0.0102958	358
CDCA8	-0.58668	-0.0302419	376
CDCP1	3.50738	0.177991	376
CDH1	4.60645	0.231127	376
CDH10	0.773868	0.078333	97
CDH11	2.42626	0.154415	241
CDH12	0.184293	0.0220219	70
CDH13	5.67546	0.309525	304
CDH15	2.11626	0.389776	25
CDH16	0.821172	0.124257	43
CDH17	-1.0871	-0.0673952	259
CDH19	-0.188533	-0.026136	52
CDH2	7.55052	0.362851	376
CDH23	-0.887952	-0.216713	16
CDH24	0.437917	0.0872494	25
CDH3	5.31557	0.264376	376
CDH4	6.42517	0.329049	340
CDH5	1.0165	0.0878012	133
CDH6	3.44015	0.209038	259
CDH7	0.153611	0.0307077	25
CDH8	2.99712	0.415694	43
CDHR2	-2.75832	-0.427617	34
CDHR5	-1.55801	-0.195628	61
CDIP1	0.332129	0.0309563	115
CDIPT	4.19815	0.219254	349
CDK1	-4.69532	-0.235341	376
CDK10	4.78377	0.284928	259
CDK11A	2.45397	0.125552	376
CDK11B	1.43961	0.0740383	376
CDK12	2.62328	0.134064	376
CDK13	3.29251	0.167402	376
CDK14	-3.58195	-0.306217	124
CDK16	2.16389	0.11224	367
CDK17	0.520709	0.0290058	322
CDK18	0.503674	0.0397874	160
CDK19	-0.0523056	-0.00276443	358
CDK2	-2.63688	-0.134746	376
CDK2AP1	-0.364486	-0.0192601	358
CDK3	-4.57595	-0.237912	349
CDK4	0.314652	0.0162248	376
CDK5	-2.62975	-0.134389	376
CDK5RAP1	4.02554	0.203267	376
CDK5RAP2	2.82142	0.143988	376
CDK5RAP3	3.65758	0.185357	376
CDK6	-5.4489	-0.270528	376
CDK7	3.23995	0.166756	367
CDK8	0.641514	0.0357274	322
CDK9	0.00624033	0.00032182	376
CDKAL1	1.50363	0.0773116	376
CDKL5	4.80999	0.295958	241
CDKN1A	4.38081	0.250766	286
CDKN1B	-6.77597	-0.333458	367
CDKN1C	-1.02311	-0.121381	70
CDKN2AIP	-1.29786	-0.0667826	376
CDKN2AIPNL	4.34927	0.218859	376
CDKN2B	-0.0276343	-0.00310909	79
CDKN2C	-7.42233	-0.365189	358
CDKN2D	-2.8338	-0.341074	61
CDKN3	-0.516435	-0.0463275	124
CDNF	-0.722098	-0.0809756	79
CDO1	0.289321	0.0440781	43
CDON	1.25363	0.171279	52
CDPF1	-1.84603	-0.110241	277
CDR2	4.16294	0.217502	349
CDR2L	5.07014	0.268451	331
CDS1	5.03729	0.308639	241
CDS2	8.6216	0.406276	376
CDSN	1.69866	0.250766	43
CDT1	-1.91272	-0.127047	223
CDV3	-12.455	-0.540436	376
CDX1	-0.623904	-0.0947167	43
CDX2	-0.151299	-0.0135858	124
CDYL	3.98978	0.201535	376
CDYL2	0.439628	0.0426616	106
CEACAM1	1.36639	0.0729466	349
CEACAM5	-2.19581	-0.123169	313
CEACAM6	0.15162	0.0108293	196
CEACAM7	1.08315	0.14854	52
CEBPA	-2.35807	-0.150174	241
CEBPB	0.592531	0.0305432	376
CEBPD	1.25419	0.077696	259
CEBPE	-3.07452	-0.5238	25
CEBPG	-4.94442	-0.280622	286
CEBPZ	3.13385	0.159546	376
CECR1	-3.99102	-0.484238	52
CECR2	-2.14568	-0.204024	106
CECR5	2.042	0.104729	376
CEL	0.395477	0.0676682	34
CELF1	7.55113	0.362876	376
CELF3	-0.35892	-0.0715999	25
CELF4	-1.18918	-0.162711	52
CELF5	0.546652	0.202341	7
CELSR1	7.8164	0.385979	349
CELSR2	6.70929	0.359133	304
CELSR3	5.51739	0.409605	151
CEND1	1.07453	0.0765274	196
CENPB	4.59956	0.2308	376
CENPC	-5.17668	-0.257933	376
CENPE	1.80078	0.0971984	340
CENPF	3.18927	0.162294	376
CENPH	3.66424	0.185683	376
CENPI	3.0671	0.166237	331
CENPJ	-1.77603	-0.128795	187
CENPK	5.47704	0.274885	367
CENPL	2.22148	0.139132	250
CENPM	0.205636	0.0121586	286
CENPN	2.7831	0.179744	232
CENPO	1.01119	0.0649987	241
CENPP	2.26359	0.149869	223
CENPQ	-0.210213	-0.0111094	358
CENPT	-0.0151431	-0.000821249	340
CENPU	0.000131805	6.88015e-06	367
CENPW	-0.543872	-0.0694674	61
CEP104	-0.804234	-0.0956833	70
CEP112	3.2547	0.217177	214
CEP120	-1.30591	-0.076991	286
CEP128	-1.59647	-0.0874138	331
CEP135	-2.00095	-0.103884	367
CEP152	-0.32673	-0.0174868	349
CEP164	2.76402	0.154359	313
CEP170B	3.8236	0.193462	376
CEP192	-1.62194	-0.0843629	367
CEP250	-2.67902	-0.13686	376
CEP290	0.0167265	0.000862605	376
CEP350	-2.66541	-0.136178	376
CEP41	-2.6092	-0.133357	376
CEP44	-2.2273	-0.114114	376
CEP55	-1.38676	-0.0713345	376
CEP57	-4.67552	-0.239893	358
CEP57L1	-3.8623	-0.611316	25
CEP63	-0.231691	-0.0129106	322
CEP68	-1.61741	-0.0999971	259
CEP72	1.44976	0.105426	187
CEP76	-2.21201	-0.131748	277
CEP78	-0.330065	-0.0198278	277
CEP85	-6.64396	-0.331312	358
CEP85L	-0.535293	-0.0638492	70
CEP89	4.64245	0.272825	268
CEP95	-1.91934	-0.200449	88
CEP97	-2.56201	-0.130987	376
CEPT1	4.56401	0.240268	340
CERCAM	6.01251	0.419778	169
CERK	-1.05719	-0.098108	115
CERS1	6.0625	0.342261	277
CERS2	7.35311	0.35457	376
CERS4	3.6918	0.22359	259
CERS5	7.00628	0.37286	304
CERS6	3.01319	0.15727	358
CES1	0.715402	0.0422648	286
CES2	2.44306	0.126502	367
CES3	0.392922	0.0319592	151
CETN2	2.29987	0.117781	376
CETN3	-2.66362	-0.137715	367
CFB	0.9376	0.0614401	232
CFC1	-0.103724	-0.0391738	7
CFD	-1.60683	-0.188606	70
CFDP1	-6.49248	-0.3175	376
CFH	1.55599	0.101627	232
CFI	4.55888	0.323347	178
CFL1	-11.8482	-0.521396	376
CFL2	7.79734	0.373083	376
CFLAR	-1.67023	-0.275368	34
CFP	-1.98703	-0.322558	34
CFTR	1.09475	0.164669	43
CGA	0.57131	0.0789789	52
CGB2	3.48832	0.469647	43
CGGBP1	-8.37455	-0.396487	376
CGN	4.40248	0.221406	376
CGNL1	5.86851	0.28967	376
CGREF1	1.3842	0.0720665	367
CGRRF1	1.54384	0.181461	70
CHAC1	-1.47688	-0.219718	43
CHAC2	-7.76482	-0.371743	376
CHAF1A	-1.15725	-0.0595745	376
CHAF1B	0.207717	0.0107116	376
CHAMP1	-0.557612	-0.0287448	376
CHCHD1	0.555403	0.0313778	313
CHCHD2	-1.8907	-0.0970453	376
CHCHD3	-0.946045	-0.0487306	376
CHCHD4	-0.219289	-0.0113082	376
CHCHD5	1.35396	0.0785866	295
CHCHD6	3.25847	0.165719	376
CHCHD7	-4.86897	-0.268964	304
CHD1	1.20417	0.0619809	376
CHD1L	-6.21963	-0.305426	376
CHD2	4.41915	0.222203	376
CHD4	2.64782	0.135295	376
CHD5	2.02336	0.103783	376
CHD6	3.98476	0.201292	376
CHD7	-2.80897	-0.143365	376
CHD8	0.575313	0.0296564	376
CHD9	2.85093	0.145462	376
CHDH	1.90937	0.0979942	376
CHEK1	-9.50009	-0.444273	367
CHEK2	-5.01791	-0.250526	376
CHERP	0.785545	0.0404782	376
CHFR	0.635761	0.0349232	331
CHGA	-0.131914	-0.0157648	70
CHGB	-0.274697	-0.0238125	133
CHI3L1	0.245532	0.0238414	106
CHIC2	2.19703	0.193567	124
CHID1	2.67052	0.136434	376
CHKA	-1.3746	-0.0935533	214
CHKB	-1.4448	-0.0851225	286
CHL1	2.66932	0.191584	187
CHM	1.04408	0.0558013	349
CHML	-3.04018	-0.154893	376
CHMP1B	-2.68399	-0.137109	376
CHMP2B	-3.91061	-0.197694	376
CHMP3	2.62027	0.133913	376
CHMP4A	-12.3007	-0.535669	376
CHMP4B	-7.76268	-0.371654	376
CHMP4C	-3.9611	-0.202485	367
CHMP5	-9.15597	-0.426977	376
CHMP6	5.40652	0.268576	376
CHMP7	-6.51623	-0.318544	376
CHN1	0.693413	0.0463844	223
CHN2	-3.11854	-0.331076	79
CHORDC1	-6.62532	-0.323323	376
CHP1	10.0706	0.460898	376
CHPF	8.12694	0.407855	331
CHPF2	5.47831	0.281397	349
CHPT1	1.05798	0.0884358	142
CHRAC1	-1.72663	-0.0908775	358
CHRD	0.703256	0.13928	25
CHRDL2	-0.887878	-0.17484	25
CHRM3	0.449675	0.111715	16
CHRNA1	1.04893	0.36855	7
CHRNA5	1.1614	0.278834	16
CHRNE	-2.72291	-0.199969	178
CHST10	0.835969	0.0994223	70
CHST11	-0.324303	-0.0281095	133
CHST12	1.7528	0.108274	259
CHST13	-0.193762	-0.0483839	16
CHST14	8.04687	0.387266	367
CHST2	2.00423	0.248561	61
CHST3	8.30106	0.510019	196
CHST5	0.547136	0.135522	16
CHST6	-0.987571	-0.193771	25
CHST7	0.610375	0.0843422	52
CHSY1	5.26943	0.289299	304
CHSY3	3.37012	0.25745	160
CHTF18	-1.5833	-0.0813815	376
CHTOP	-0.186485	-0.00961676	376
CHUK	-4.70771	-0.235928	376
CHURC1	-10.106	-0.480621	340
CHURC1-FNTB	-5.97518	-0.501952	106
CIAO1	-6.86102	-0.333565	376
CIAPIN1	-9.09719	-0.424732	376
CIB1	-0.468258	-0.0241415	376
CILP2	0.253031	0.0350675	52
CINP	-3.07809	-0.162574	349
CIR1	0.51662	0.0266332	376
CIRBP	-1.22623	-0.063112	376
CIRH1A	1.45962	0.0750619	376
CISD1	-1.34613	-0.0692548	376
CISD2	1.13641	0.0585055	376
CISD3	3.02815	0.158032	358
CITED2	-1.10022	-0.139491	61
CKAP2	-6.52322	-0.318851	376
CKAP2L	-1.79426	-0.0921383	376
CKAP4	12.7243	0.54863	376
CKAP5	-2.66952	-0.136383	376
CKB	-0.216363	-0.0111574	376
CKM	-2.54815	-0.262135	88
CKMT1A	1.0841	0.0558212	376
CKMT2	1.36967	0.0713143	367
CKS1B	-4.6345	-0.237908	358
CKS2	-5.23363	-0.263536	367
CLASP2	-4.72949	-0.236958	376
CLASRP	-1.04411	-0.0537681	376
CLCA1	0.561015	0.207432	7
CLCA2	-0.189709	-0.0226687	70
CLCA4	-0.0658187	-0.0100367	43
CLCC1	10.7086	0.483432	376
CLCN2	2.90157	0.207563	187
CLCN4	-0.0414185	-0.00828342	25
CLCN5	3.3038	0.183569	313
CLCN6	2.36012	0.153122	232
CLCN7	3.46934	0.176121	376
CLDN1	4.86481	0.265135	313
CLDN11	1.30605	0.116488	124
CLDN12	3.63545	0.276225	160
CLDN16	-0.182113	-0.0686699	7
CLDN18	0.550946	0.05863	88
CLDN2	0.62688	0.0703547	79
CLDN3	0.158525	0.0092293	295
CLDN4	3.41527	0.236998	196
CLDN6	3.28668	0.219208	214
CLDN7	1.43424	0.0858571	277
CLDND1	9.33515	0.456518	331
CLEC11A	-6.45373	-0.356538	286
CLEC16A	-1.94601	-0.0998564	376
[truncated: 9,744 more rows]

## Sheet: Supplementary Table 2
Supplementary Table 2 - List of positively enriched genesets
Unprocessed output of Gene Set Enrichment Analysis is shown for positively enriched genesets. The pre-ranked analysis was done with input from Supplementary Table 1, the hallmark gene set (h.all.v7.1.symbols.gmt [Hallmarks]), 1,000 permutations and no dataset collapse/remapping. ES, enrichment score; FDR, false discovery rate; FWER, familywise-error rate; GS, gene set; NES, normalized enrichment …
	GS	SIZE	ES	NES	NOM p-val	FDR q-val	FWER p-val	RANK AT MAX	LEADING EDGE
1	HALLMARK_EPITHELIAL_MESENCHYMAL_TRANSITION	166	0.6	2.74	0	0	0	2976	tags=62%, list=25%, signal=82%
2	HALLMARK_UV_RESPONSE_DN	119	0.48	2.08	0	0	0	2914	tags=51%, list=25%, signal=67%
3	HALLMARK_PROTEIN_SECRETION	82	0.49	2.01	0	0	0.001	1577	tags=40%, list=13%, signal=46%
4	HALLMARK_WNT_BETA_CATENIN_SIGNALING	31	0.58	1.94	0	0.001	0.002	2300	tags=45%, list=20%, signal=56%
5	HALLMARK_NOTCH_SIGNALING	24	0.59	1.91	0	0	0.002	2055	tags=46%, list=18%, signal=55%
6	HALLMARK_APICAL_SURFACE	30	0.55	1.8	0	0.002	0.008	3065	tags=53%, list=26%, signal=72%
7	HALLMARK_ESTROGEN_RESPONSE_EARLY	162	0.39	1.78	0	0.002	0.011	3786	tags=52%, list=32%, signal=75%
8	HALLMARK_OXIDATIVE_PHOSPHORYLATION	174	0.38	1.77	0	0.002	0.012	3487	tags=45%, list=30%, signal=64%
9	HALLMARK_COAGULATION	116	0.39	1.71	0	0.004	0.028	2596	tags=37%, list=22%, signal=47%
10	HALLMARK_ANGIOGENESIS	33	0.5	1.68	0.003	0.005	0.041	999	tags=30%, list=9%, signal=33%
11	HALLMARK_MYOGENESIS	144	0.37	1.67	0	0.005	0.045	2341	tags=31%, list=20%, signal=39%
12	HALLMARK_TGF_BETA_SIGNALING	42	0.44	1.58	0.007	0.013	0.127	2216	tags=43%, list=19%, signal=53%
13	HALLMARK_APICAL_JUNCTION	146	0.35	1.57	0	0.014	0.145	2965	tags=43%, list=25%, signal=57%
14	HALLMARK_BILE_ACID_METABOLISM	88	0.35	1.49	0.015	0.028	0.288	3358	tags=41%, list=29%, signal=57%
15	HALLMARK_ADIPOGENESIS	163	0.32	1.48	0.004	0.029	0.312	2853	tags=39%, list=24%, signal=51%
16	HALLMARK_GLYCOLYSIS	166	0.32	1.47	0.002	0.028	0.323	1524	tags=27%, list=13%, signal=31%
17	HALLMARK_INFLAMMATORY_RESPONSE	118	0.32	1.4	0.032	0.052	0.546	1120	tags=18%, list=10%, signal=19%
18	HALLMARK_HYPOXIA	159	0.3	1.36	0.019	0.066	0.649	1458	tags=23%, list=12%, signal=26%
19	HALLMARK_IL6_JAK_STAT3_SIGNALING	61	0.35	1.35	0.062	0.07	0.686	1360	tags=23%, list=12%, signal=26%
20	HALLMARK_PEROXISOME	92	0.32	1.33	0.045	0.081	0.768	2720	tags=37%, list=23%, signal=48%
21	HALLMARK_UNFOLDED_PROTEIN_RESPONSE	98	0.29	1.24	0.103	0.157	0.947	2422	tags=33%, list=21%, signal=41%
22	HALLMARK_CHOLESTEROL_HOMEOSTASIS	64	0.31	1.22	0.146	0.173	0.967	1769	tags=27%, list=15%, signal=31%
23	HALLMARK_COMPLEMENT	160	0.27	1.22	0.085	0.169	0.973	1184	tags=19%, list=10%, signal=21%
24	HALLMARK_HEDGEHOG_SIGNALING	25	0.39	1.22	0.207	0.162	0.973	2963	tags=44%, list=25%, signal=59%
25	HALLMARK_ESTROGEN_RESPONSE_LATE	162	0.27	1.2	0.108	0.175	0.981	2726	tags=31%, list=23%, signal=40%
26	HALLMARK_P53_PATHWAY	158	0.25	1.14	0.166	0.26	0.997	2022	tags=23%, list=17%, signal=28%
27	HALLMARK_XENOBIOTIC_METABOLISM	154	0.24	1.08	0.267	0.363	1	1468	tags=18%, list=13%, signal=20%
28	HALLMARK_IL2_STAT5_SIGNALING	147	0.24	1.07	0.296	0.367	1	1603	tags=18%, list=14%, signal=21%
29	HALLMARK_TNFA_SIGNALING_VIA_NFKB	146	0.23	1.02	0.413	0.47	1	2143	tags=22%, list=18%, signal=26%
30	HALLMARK_APOPTOSIS	132	0.22	0.99	0.5	0.525	1	1796	tags=23%, list=15%, signal=27%
31	HALLMARK_KRAS_SIGNALING_DN	91	0.23	0.98	0.493	0.536	1	4840	tags=45%, list=41%, signal=76%
32	HALLMARK_UV_RESPONSE_UP	131	0.22	0.97	0.515	0.535	1	2484	tags=27%, list=21%, signal=34%
33	HALLMARK_FATTY_ACID_METABOLISM	137	0.19	0.84	0.849	0.823	1	1998	tags=20%, list=17%, signal=23%

## Sheet: Supplementary Table 3
Supplementary Table 3 - List of negatively enriched genesets
Unprocessed output of Gene Set Enrichment Analysis is shown for negatively enriched genesets. The pre-ranked analysis was done with input from Supplementary Table 1, the hallmark gene set (h.all.v7.1.symbols.gmt [Hallmarks]), 1,000 permutations and no dataset collapse/remapping. ES, enrichment score; FDR, false discovery rate; FWER, familywise-error rate; GS, gene set; NES, normalized enrichment …
	GS	SIZE	ES	NES	NOM p-val	FDR q-val	FWER p-val	RANK AT MAX	LEADING EDGE
1	HALLMARK_E2F_TARGETS	178	-0.53	-2.46	0	0	0	3045	tags=52%, list=26%, signal=69%
2	HALLMARK_MYC_TARGETS_V1	175	-0.48	-2.23	0	0	0	2393	tags=41%, list=20%, signal=51%
3	HALLMARK_ALLOGRAFT_REJECTION	123	-0.5	-2.23	0	0	0	2772	tags=48%, list=24%, signal=62%
4	HALLMARK_REACTIVE_OXYGEN_SPECIES_PATHWAY	45	-0.51	-1.94	0	0	0	2640	tags=53%, list=22%, signal=69%
5	HALLMARK_G2M_CHECKPOINT	165	-0.4	-1.86	0	0.001	0.004	3045	tags=44%, list=26%, signal=58%
6	HALLMARK_PI3K_AKT_MTOR_SIGNALING	89	-0.43	-1.82	0.002	0.001	0.01	2772	tags=54%, list=24%, signal=70%
7	HALLMARK_MYC_TARGETS_V2	54	-0.42	-1.62	0.004	0.007	0.068	1857	tags=30%, list=16%, signal=35%
8	HALLMARK_INTERFERON_GAMMA_RESPONSE	163	-0.33	-1.52	0.002	0.018	0.177	2447	tags=28%, list=21%, signal=34%
9	HALLMARK_DNA_REPAIR	140	-0.32	-1.45	0.008	0.032	0.323	2619	tags=32%, list=22%, signal=41%
10	HALLMARK_MTORC1_SIGNALING	176	-0.29	-1.37	0.009	0.055	0.516	1792	tags=28%, list=15%, signal=32%
11	HALLMARK_MITOTIC_SPINDLE	169	-0.28	-1.29	0.043	0.099	0.759	2847	tags=39%, list=24%, signal=51%
12	HALLMARK_INTERFERON_ALPHA_RESPONSE	83	-0.28	-1.2	0.151	0.191	0.964	1571	tags=20%, list=13%, signal=23%
13	HALLMARK_ANDROGEN_RESPONSE	83	-0.27	-1.11	0.258	0.299	0.998	1485	tags=22%, list=13%, signal=25%
14	HALLMARK_SPERMATOGENESIS	82	-0.26	-1.1	0.276	0.311	1	2011	tags=20%, list=17%, signal=23%
15	HALLMARK_HEME_METABOLISM	164	-0.22	-1.03	0.372	0.425	1	2345	tags=27%, list=20%, signal=33%
16	HALLMARK_PANCREAS_BETA_CELLS	31	-0.26	-0.89	0.642	0.76	1	231	tags=6%, list=2%, signal=7%
17	HALLMARK_KRAS_SIGNALING_UP	149	-0.15	-0.68	1	0.984	1	2064	tags=15%, list=18%, signal=18%
